# Supplementary material for: Antineoplastic indole-containing compounds with potential VEGFR inhibitory properties
Source: Royal Society of Chemistry journal article supplement (doi:10.1039/d3ra08962b), 2024-01-01
Supplement: d3ra08962b1.pdf [file d3ra08962b1.pdf]

## Antineoplastic indole-containing compounds with potential VEGFR inhibitory properties

Dalia R. Aboshouk,<sup>a</sup> M. Adel Youssef,<sup>b</sup> Mohamed S. Bekheit,<sup>a</sup> Ahmed R. Hamed<sup>c</sup> and  
Adel S. Girgis<sup>\*a</sup>

<sup>a</sup>*Department of Pesticide Chemistry, National Research Centre, Dokki, Giza 12622,  
Egypt*

<sup>b</sup>*Department of Chemistry, Faculty of Science, Helwan University, Helwan, Egypt*

<sup>c</sup>*Chemistry of Medicinal Plants Department, National Research Centre, Dokki, Giza  
12622, Egypt*

\* Corresponding author: [girgisas10@yahoo.com](mailto:girgisas10@yahoo.com), [as.girgis@nrc.sci.eg](mailto:as.girgis@nrc.sci.eg)

### Supplementary material

#### Figure captions

**Fig. S1.** Antiproliferation and anti-VEGFR-2 properties of the synthesized indole-2-carboxamides **49a–h** and reference standards (Erlotinib and Sorafenib).

**Fig. S2.** Activity of 5-indolecarboxamides **53a–l** against VEGFR-2, CDK-1/cyclin B and HER-2 at 10 mM, respectively.

**Fig. S3.** Antiproliferation and anti-VEGFR-2 properties of the synthesized indolyl Schiff bases **55**, **57–59**, **61**, **63**, **65**, **67** and **68**.

**Fig. S4.** Antiproliferation and VEGFR-2 properties ( $\mu\text{M} \pm \text{SD}$ ) of the prepared Schiff bases **73a–x** and standard references (Doxorubicin and Sorafenib).

**Fig. S5.** Antiproliferation properties ( $\mu\text{M} \pm \text{SEM}$ ) and % inhibition of VEGFR-2 for the synthesized agents and standard references "Sunitinib and 5-Fluorouracil".

**Fig. S6 .** Antiproliferation and VEGFR-2 inhibitory properties of hydrazones **106a–k** and Sorafenib.

**Fig. S7.** Antiproliferation properties of indolyl hydrazones **113** and standard references (Cisplatin, Sorafenib and Sunitinib).

**Fig S8.** Antiproliferation and VEGFR-2 inhibitory properties of 2-oxoindolin-3-ylidenes **130** and Sunitinib.

**Fig. S9.** Antiproliferation and enzymatic inhibitory properties of 2-oxoindolin-3-ylidene **146** and Nintedanib.

**Fig. S10.** Antiproliferation and enzymatic inhibitory properties of 2-oxoindolin-3-ylidenes **151,153** and Nintedanib.

**Fig. S11.** Antiproliferation and enzymatic inhibitory properties of 2-oxoindolin-3-ylidenes **168** and Sunitinib.

**Fig. S12.** Enzymatic inhibitory properties of 2-oxoindolin-3-ylidenes **172, 173** and standard references (Sunitinib and SU6668).

**Fig. S13.** VEGFR-2 inhibitory and antiproliferation properties of indole triazole conjugates **176, 177, 179, 181** and Sunitinib.

**Fig. S14.** Antiproliferation and VEGFR-2 inhibitory properties of indole triazole conjugates **177, 183-186** and standard references.

**Fig. S15.** % Inhibitory properties of VEGFR-2 by indole benzimidazole conjugates **191** and **197** at 10 mM.

**Fig. S16.** Inhibitory properties of VEGFR-2 by indole-pyrimidine conjugates **211** and Sunitinib.

**Fig. S17.** Antiproliferation and inhibitory properties of VEGFR-2 for indole pyrimidine conjugates **221** and Sorafenib.

**Fig. S18.** Antiproliferation and enzymatic inhibitory (VEGFR-2 and EGFR) properties of spiroindoles **230** and reference standards (Sunitinib and 5-Fluorouracil).

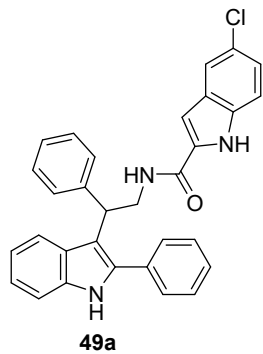

$IC_{50} = 26 \pm 2, 28 \pm 2, 26 \pm 2, 25 \pm 2$  nM against Panc-1, MCF7, HT-29 and A-549, respectively;  
 $IC_{50} = 2.15 \pm 0.20$  nM against VEGFR-2

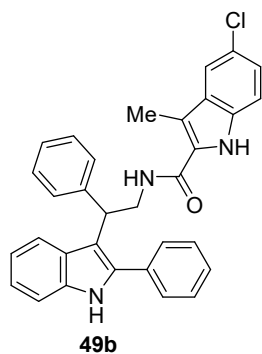

$IC_{50} = 58 \pm 5, 61 \pm 6, 59 \pm 5, 58 \pm 5$  nM against Panc-1, MCF7, HT-29 and A-549, respectively

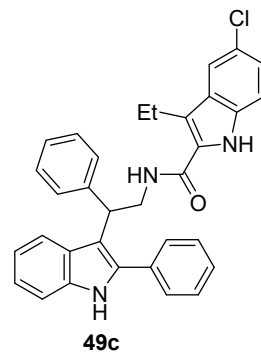

$IC_{50} = 56 \pm 5, 57 \pm 5, 55 \pm 5, 54 \pm 5$  nM against Panc-1, MCF7, HT-29 and A-549, respectively

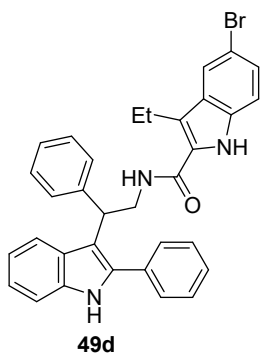

$IC_{50} = 66 \pm 6, 68 \pm 6, 66 \pm 6, 64 \pm 6$  nM against Panc-1, MCF7, HT-29 and A-549, respectively

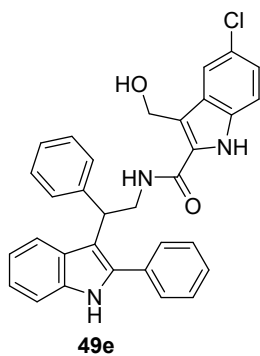

$IC_{50} = 44 \pm 4, 46 \pm 4, 45 \pm 4, 42 \pm 4$  nM against Panc-1, MCF7, HT-29 and A-549, respectively;  
 $IC_{50} = 1.10 \pm 0.08$  nM against VEGFR-2

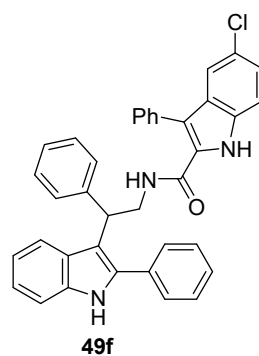

$IC_{50} = 48 \pm 4, 49 \pm 4, 48 \pm 4, 46 \pm 4$  nM against Panc-1, MCF7, HT-29 and A-549, respectively;  
 $IC_{50} = 2.50 \pm 0.20$  nM against VEGFR-2

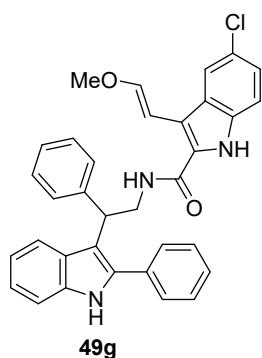

$IC_{50} = 30 \pm 2, 33 \pm 3, 30 \pm 2, 30 \pm 2$  nM against Panc-1, MCF7, HT-29 and A-549, respectively;  
 $IC_{50} = 1.60 \pm 0.10$  nM against VEGFR-2

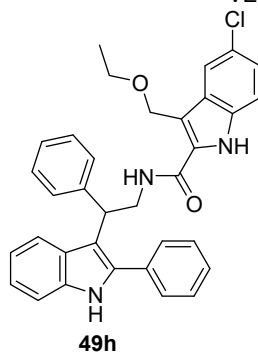

$IC_{50} = 36 \pm 3, 38 \pm 3, 38 \pm 3, 34 \pm 3$  nM against Panc-1, MCF7, HT-29 and A-549, respectively;  
 $IC_{50} = 3.25 \pm 0.25$  nM against VEGFR-2

**Fig. S1.** Antiproliferation and anti-VEGFR-2 properties of the synthesized indole-2-carboxamides **49a–h** and reference standards (Erlotinib and Sorafenib).

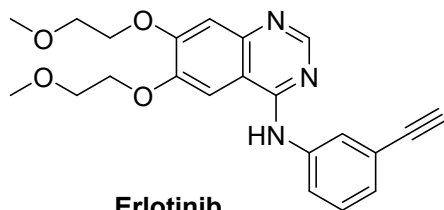

**Erlotinib**

$IC_{50} = 30 \pm 3, 40 \pm 3,$   
 $30 \pm 3, 30 \pm 3$  nM against  
Panc-1, MCF7, HT-29  
and A-549, respectively

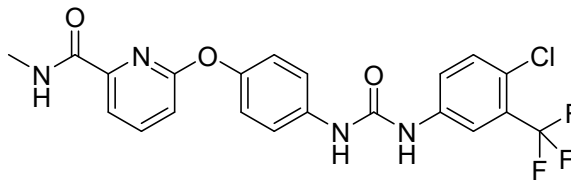

**Sorafenib**

$IC_{50} = 0.17 \pm 0.01$  nM against VEGFR-2

**Fig. S1 (continued).** Antiproliferation and anti-VEGFR-2 properties of the synthesized indole-2-carboxamides **49a–h** and reference standards (Erlotinib and Sorafenib).

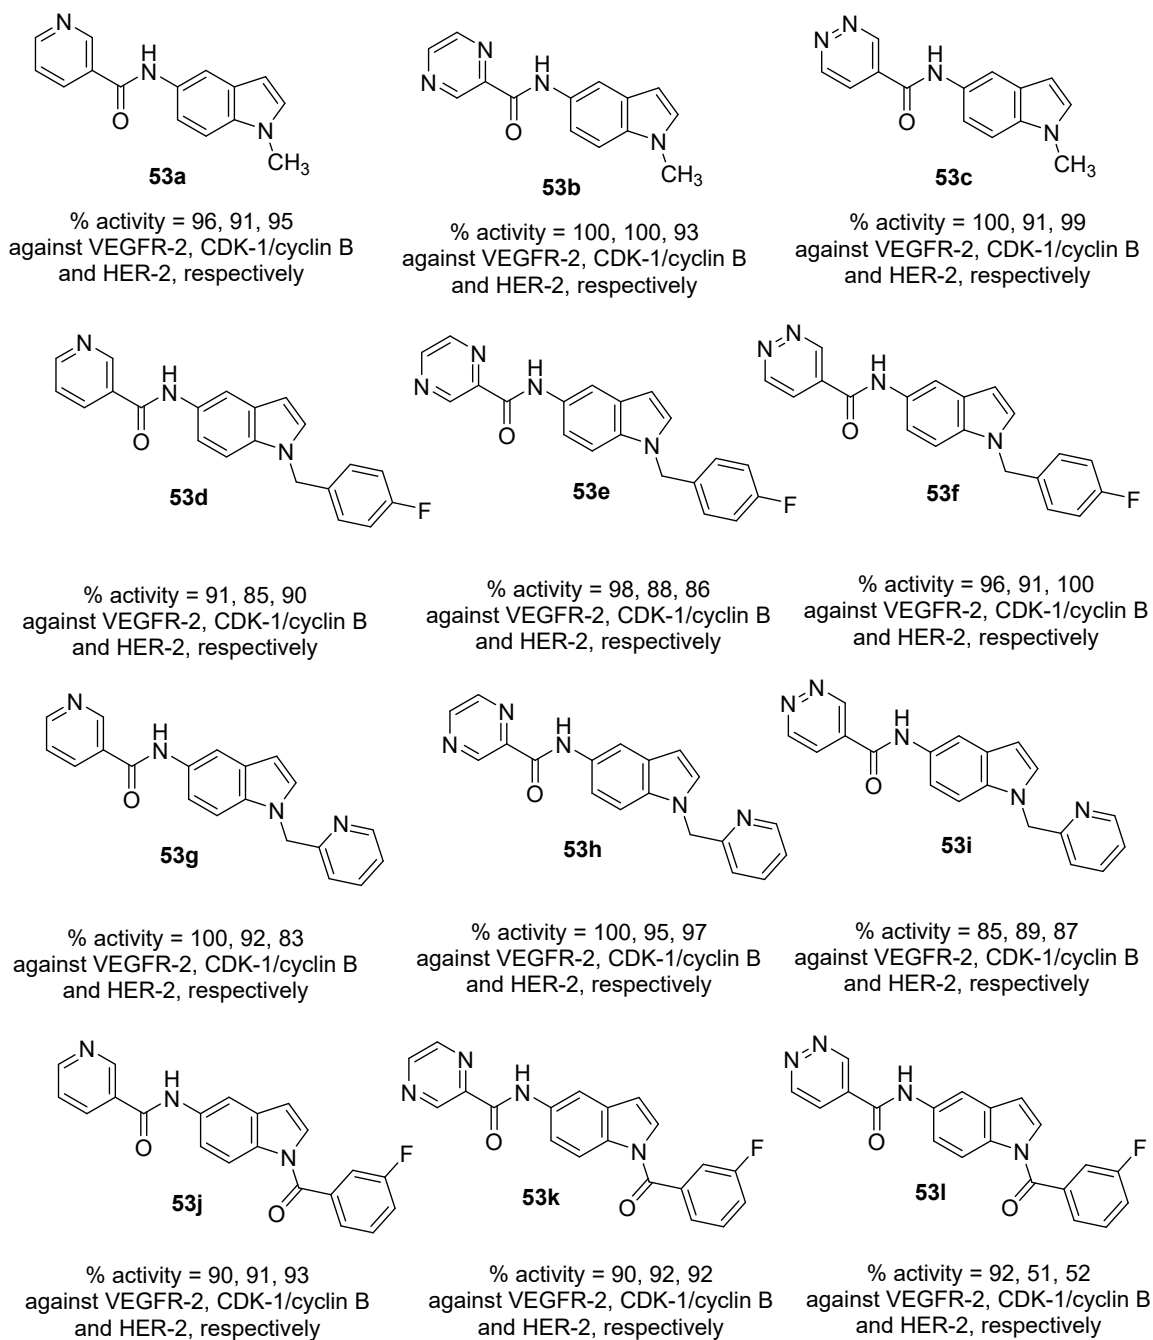

**Fig. S2.** Activity of 5-indolecarboxamides **53a–l** against VEGFR-2, CDK-1/cyclin B and HER-2 at 10  $\mu$ M, respectively.

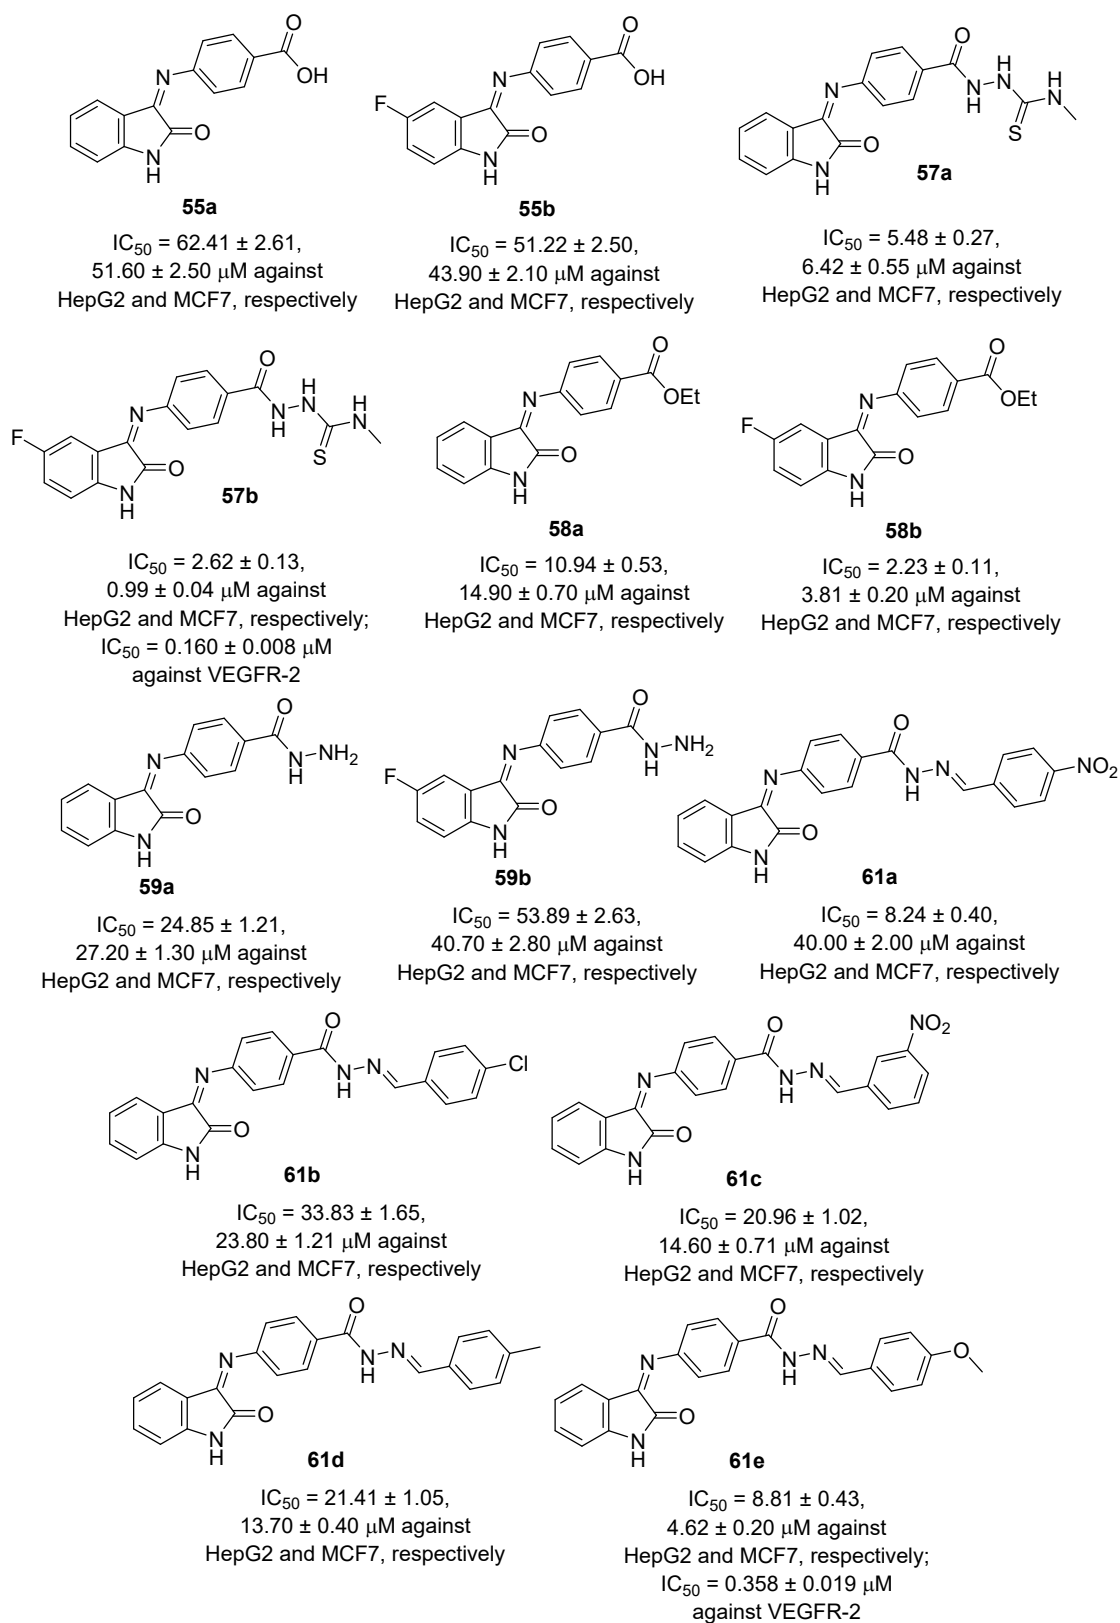

**Fig. S3.** Antiproliferation and anti-VEGFR-2 properties of the synthesized indolyl Schiff bases **55**, **57**–**59**, **61**, **63**, **65**, **67** and **68**.

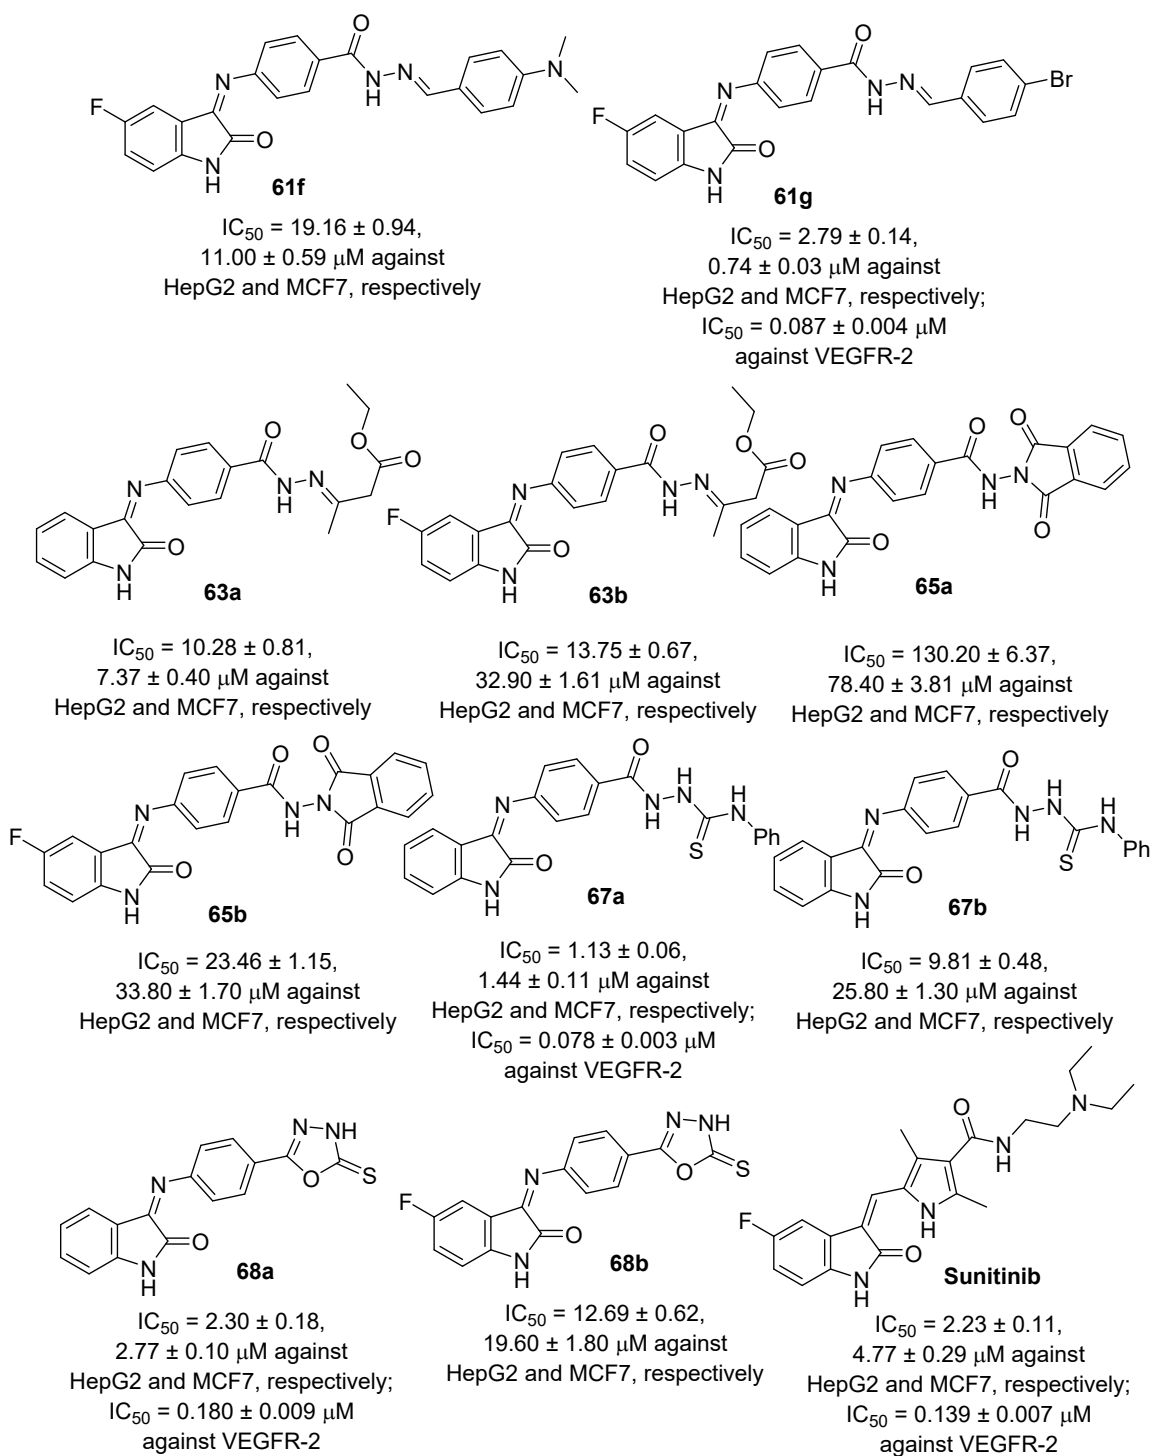

**Fig. S3 (continued).** Antiproliferation and anti-VEGFR-2 properties of the synthesized indolyl Schiff bases **55**, **57-59**, **61**, **63**, **65**, **67** and **68**.

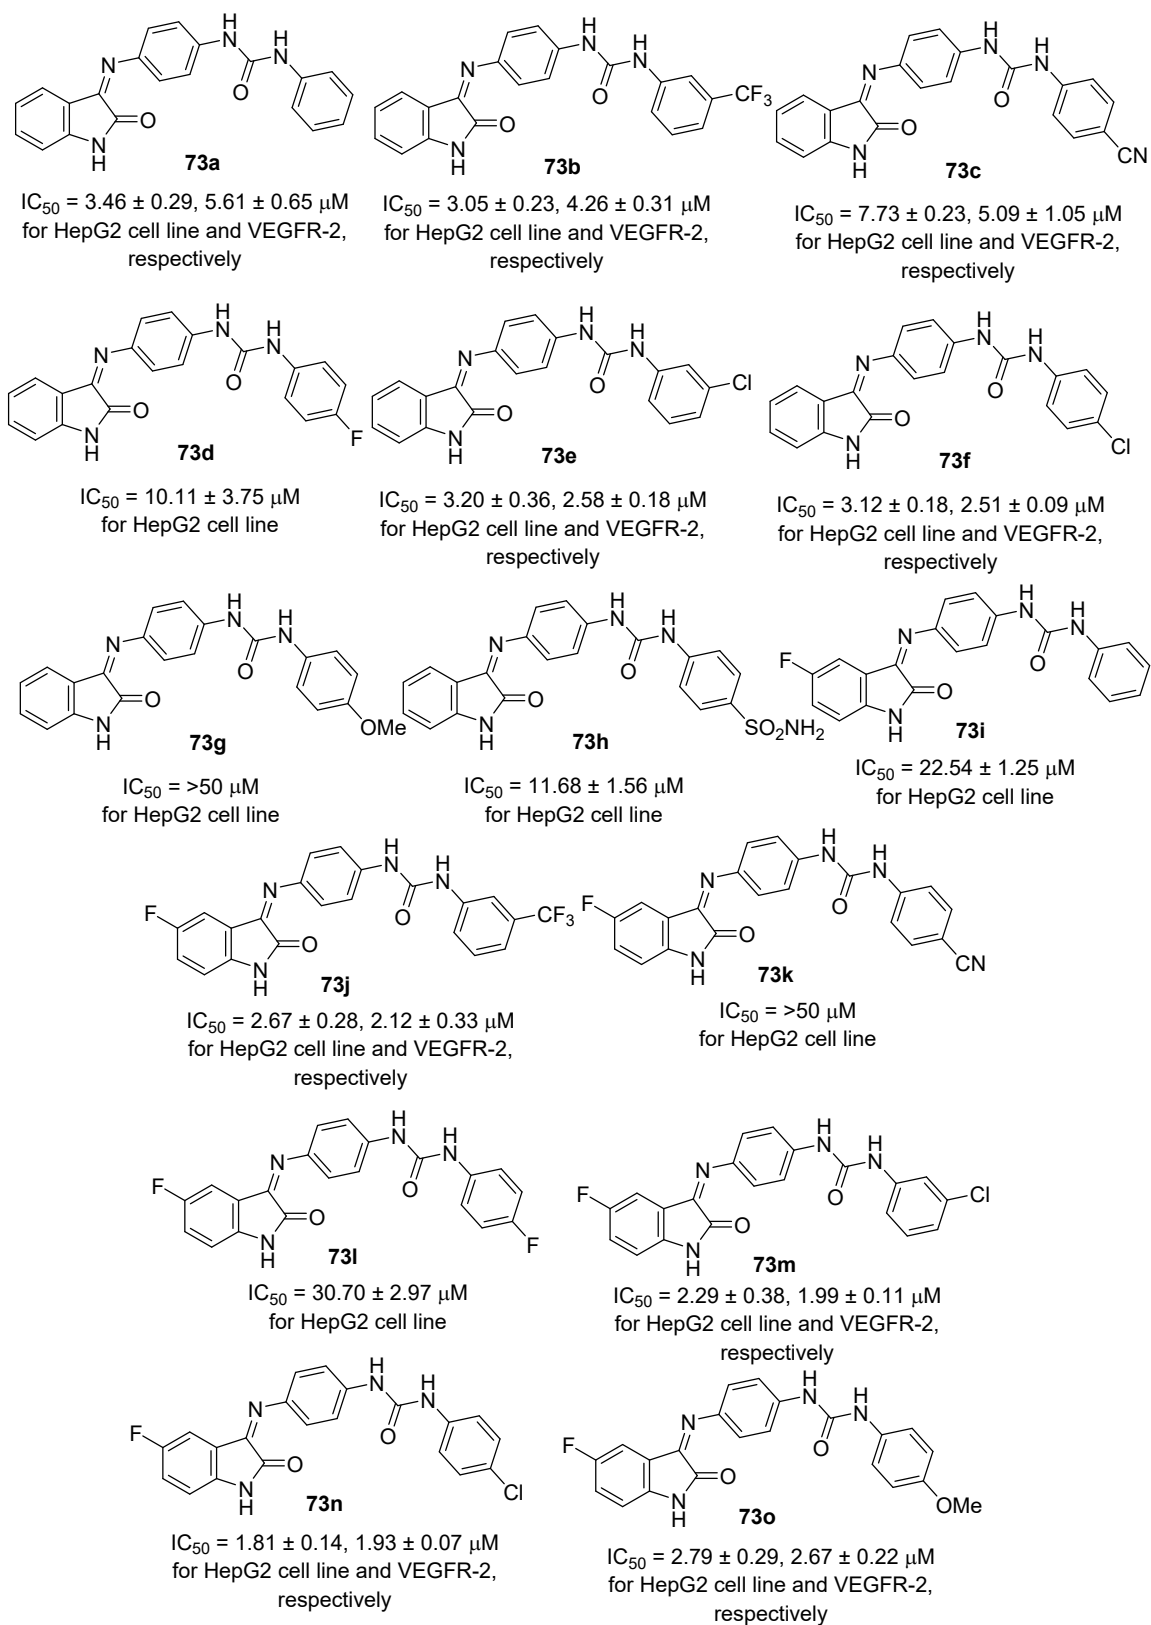

**Fig. S4.** Antiproliferation and VEGFR-2 properties ( $\mu M \pm SD$ ) of the prepared Schiff bases **73a–x** and standard references (Doxorubicin and Sorafenib).



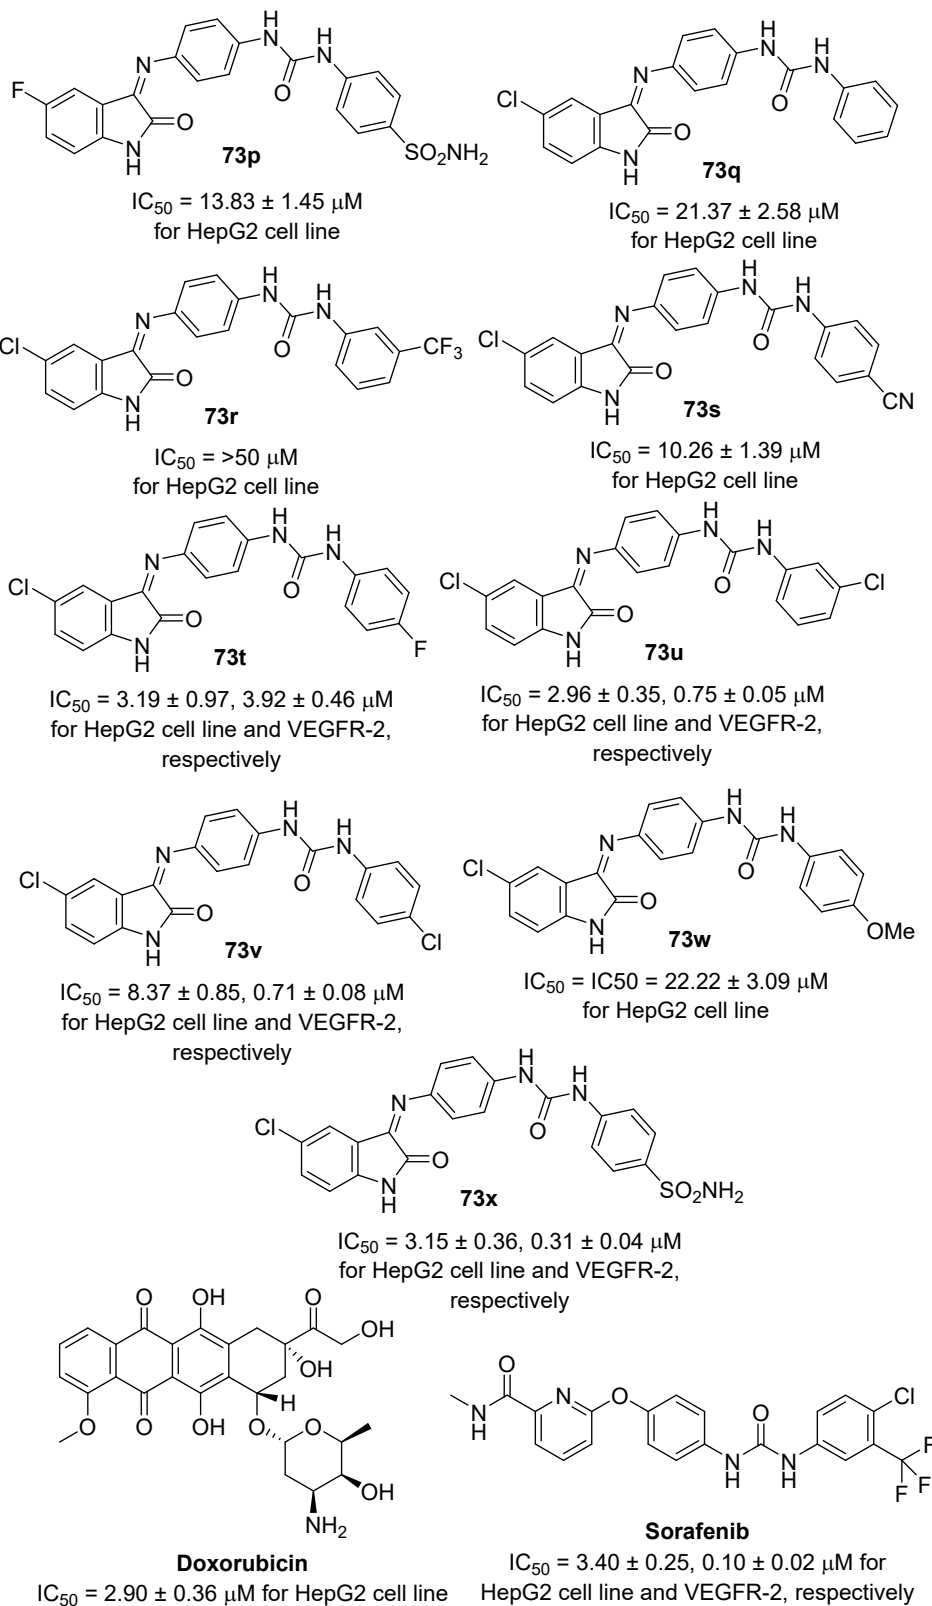

**Fig. S4 (continued).** Antiproliferation and VEGFR-2 properties ( $\mu\text{M} \pm \text{SD}$ ) of the prepared Schiff bases **73a–x** and standard references (Doxorubicin and Sorafenib).



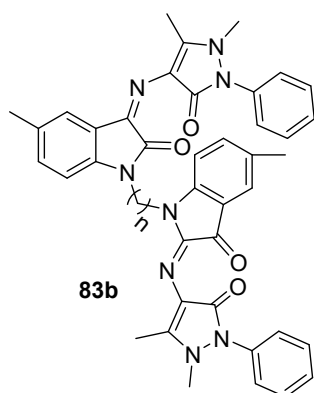

n = 3; IC<sub>50</sub> = 43.830 ± 2.47,  
>50.00 ± 1.02, 40.426 ± 1.04  
against MCF7, HCT116  
and PaCa2 cell lines, respectively

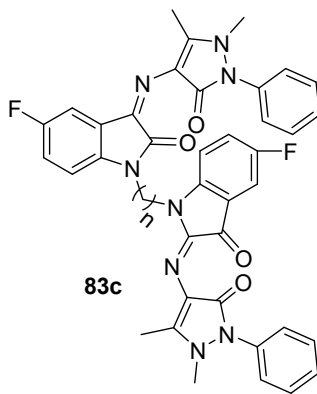

n = 6; IC<sub>50</sub> = >50.000 ± 1.68,  
>50.00 ± 1.16, 43.085 ± 1.41  
against MCF7, HCT116  
and PaCa2 cell lines, respectively

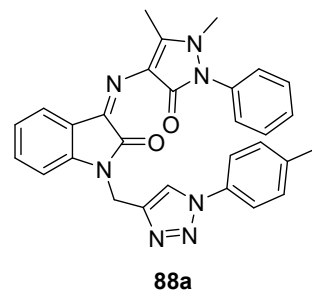

IC<sub>50</sub> = 27.609 ± 1.37,  
>50.00 ± 1.84, >50.000 ± 0.92  
against MCF7, HCT116  
and PaCa2 cell lines, respectively

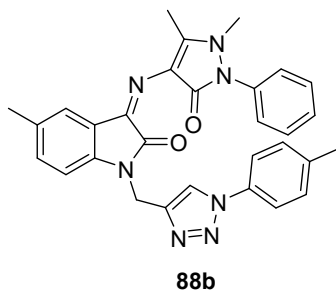

IC<sub>50</sub> = 5.819 ± 0.23,  
17.87 ± 1.11, 25.000 ± 1.31  
against MCF7, HCT116  
and PaCa2 cell lines, respectively;  
% inhibition = 79.2 ± 3.9 gainst  
VEGFR-2 utilizing IC<sub>50</sub>  
value observed against MCF7 cell line

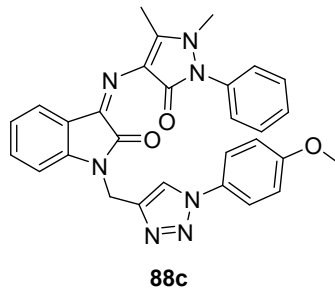

IC<sub>50</sub> = 12.500 ± 0.96,  
45.43 ± 2.02, 37.766 ± 1.66  
against MCF7, HCT116  
and PaCa2 cell lines, respectively

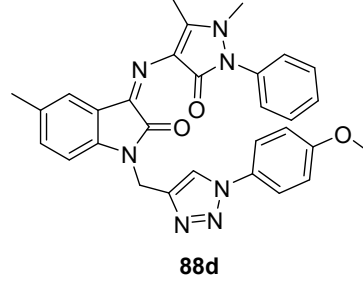

IC<sub>50</sub> = 8.936 ± 0.19,  
16.30 ± 0.99, 16.489 ± 0.83  
against MCF7, HCT116  
and PaCa2 cell lines, respectively;  
% inhibition = 57.9 ± 5.0 gainst  
VEGFR-2 utilizing IC<sub>50</sub>  
value observed against MCF7 cell line

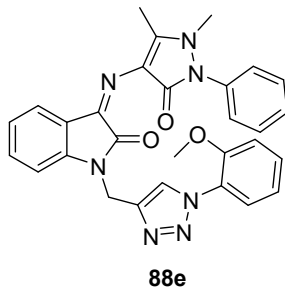

IC<sub>50</sub> = 25.870 ± 1.47,  
>50.00 ± 1.86, 50.000 ± 1.48  
against MCF7, HCT116  
and PaCa2 cell lines, respectively

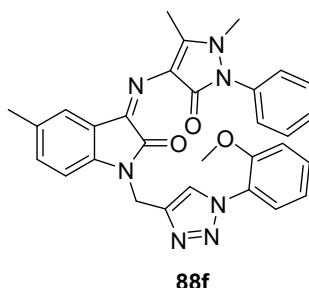

IC<sub>50</sub> = 5.361 ± 0.31,  
12.50 ± 0.88, 12.128 ± 0.79  
against MCF7, HCT116  
and PaCa2 cell lines, respectively;  
% inhibition = 77.6 ± 4.4 gainst  
VEGFR-2 utilizing IC<sub>50</sub>  
value observed against MCF7 cell line

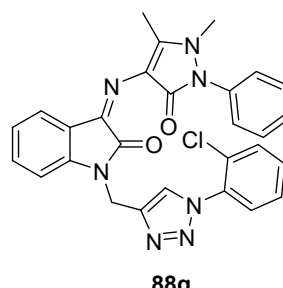

IC<sub>50</sub> = 21.702 ± 1.64,  
>50.00 ± 1.01, >50.000 ± 1.17  
against MCF7, HCT116  
and PaCa2 cell lines, respectively

**Fig. S5 (continued).** Antiproliferation properties ( $\mu\text{M} \pm \text{SEM}$ ) and % inhibition of VEGFR-2 for the synthesized agents and standard references "Sunitinib and 5-Fluorouracil".

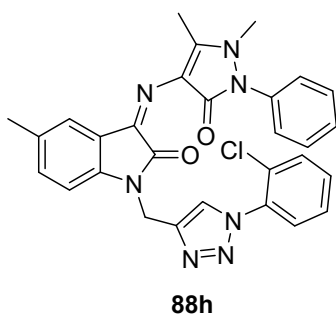

$IC_{50} = 7.660 \pm 0.13,$   
 $22.13 \pm 2.63, 17.553 \pm 0.84$   
 against MCF7, HCT116  
 and PaCa2 cell lines, respectively

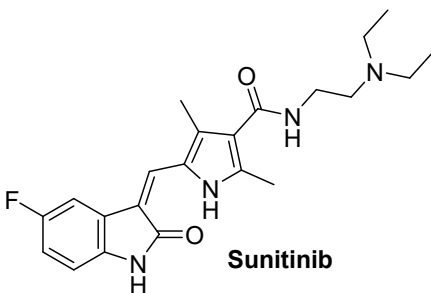

$IC_{50} = 11.304 \pm 0.28,$   
 $9.67 \pm 0.84, 6.596 \pm 0.43$   
 against MCF7, HCT116  
 and PaCa2 cell lines, respectively;  
 % inhibition =  $67.1 \pm 3.3$  gainst  
 VEGFR-2 utilizing  $IC_{50}$   
 value observed against MCF7 cell line

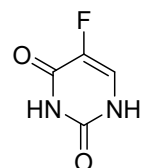

$IC_{50} = 20.43 \pm 1.99$   
 against HCT116 cell line

**Fig. S5 (continued).** Antiproliferation properties ( $\mu\text{M} \pm \text{SEM}$ ) and % inhibition of VEGFR-2 for the synthesized agents and standard references "Sunitinib and 5-Fluorouracil".

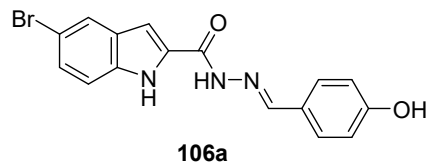

$IC_{50} = 56.6 \pm 2.4, 61.8 \pm 3.2, 90.1 \pm 1.9$   
 $\mu\text{M}$  against HepG2, HeLa and PC3,  
 respectively;  $EC_{50} = 195.0 \pm 2.3$  nM  
 $\pm$  SEM against VEGFR-2

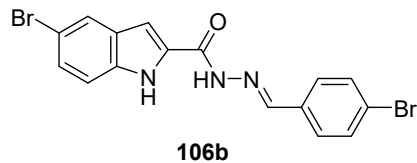

$IC_{50} = 68.5 \pm 2.2, 40.1 \pm 3.0, 69.8 \pm 2.7$   
 $\mu\text{M}$  against HepG2, HeLa and PC3,  
 respectively;  $EC_{50} = 200.3 \pm 2.5$  nM  
 $\pm$  SEM against VEGFR-2

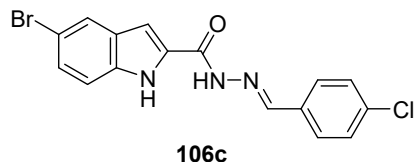

$IC_{50} = 92.9 \pm 2.2, 63.4 \pm 2.1, 95.5 \pm 2.2$   
 $\mu\text{M}$  against HepG2, HeLa and PC3,  
 respectively;  $EC_{50} = 309.3 \pm 3.2$  nM  
 $\pm$  SEM against VEGFR-2

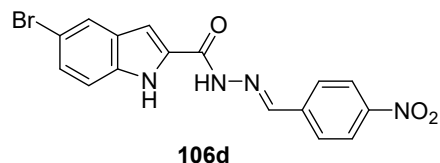

$IC_{50} = 37.6 \pm 3.0, 41.6 \pm 2.3, 119.5 \pm 3.6$   
 $\mu\text{M}$  against HepG2, HeLa and PC3,  
 respectively;  $EC_{50} = 321.5 \pm 2.3$  nM  
 $\pm$  SEM against VEGFR-2

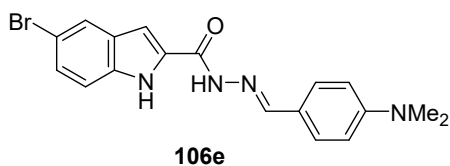

$IC_{50} = 14.3 \pm 2.0, 22.2 \pm 2.3, 36.2 \pm 3.1, 25.9 \pm 2.1$   
 $\mu\text{M}$  against HepG2, HeLa, PC3 and WI-38,  
 respectively;  $EC_{50} = 102.6 \pm 3.1$  nM  
 $\pm$  SEM against VEGFR-2

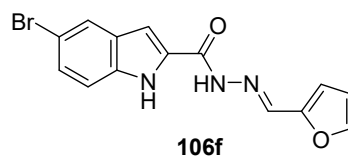

$IC_{50} = 60.7 \pm 3.3, 67.4 \pm 2.0, 109.3 \pm 2.2$   
 $\mu\text{M}$  against HepG2, HeLa and PC3,  
 respectively;  $EC_{50} = 192.6 \pm 3.1$  nM  
 $\pm$  SEM against VEGFR-2

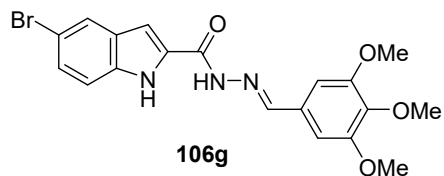

$IC_{50} = 56.4 \pm 4.0, 47.0 \pm 2.3, 70.3 \pm 3.1$   
 $\mu\text{M}$  against HepG2, HeLa and PC3,  
 respectively;  $EC_{50} = 329.5 \pm 3.4$  nM  
 $\pm$  SEM against VEGFR-2

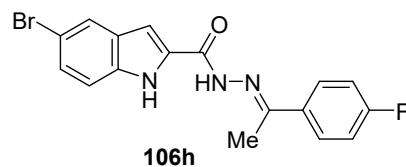

$IC_{50} = 32.6 \pm 3.9, 35.0 \pm 2.7, 37.6 \pm 4.0$   
 $\mu\text{M}$  against HepG2, HeLa and PC3,  
 respectively;  $EC_{50} = 190.9 \pm 3.0$  nM  
 $\pm$  SEM against VEGFR-2

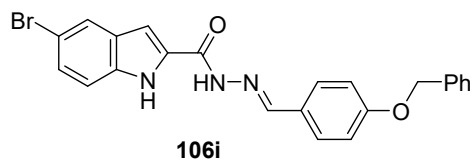

$IC_{50} = 70.1 \pm 2.1, 71.9 \pm 3.2, 113.1 \pm 2.7$   
 $\mu\text{M}$  against HepG2, HeLa and PC3,  
 respectively;  $EC_{50} = 320.0 \pm 3.2$  nM  
 $\pm$  SEM against VEGFR-2

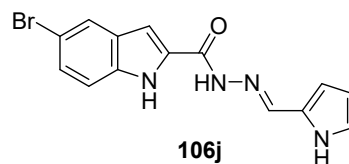

$IC_{50} = 38.55 \pm 3.1, 39.15 \pm 2.3, 43.5 \pm 2.6$   
 $\mu\text{M}$  against HepG2, HeLa and PC3,  
 respectively;  $EC_{50} = 136.1 \pm 3.3$  nM  
 $\pm$  SEM against VEGFR-2

**Fig. S6** . Antiproliferation and VEGFR-2 inhibitory properties of hydrazones **106a-k** and Sorafenib.

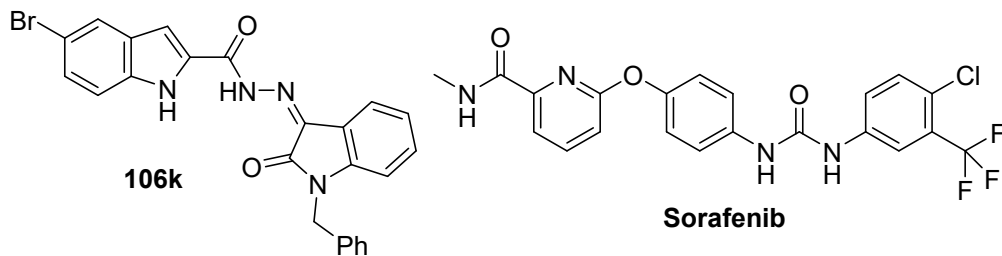

$IC_{50} = 118.7 \pm 4.3, 105.2 \pm 4.2, 144.6 \pm 3.4$   $IC_{50} = 6.2 \pm 1.1, 11.7 \pm 1.3, 19.0 \pm 1.2,$   
 $\mu M$  against HepG2, HeLa and PC3,  $15.3 \pm 1.8 \mu M$  against HepG2, HeLa, PC3  
 respectively;  $EC_{50} = 253.8 \pm 6.1$  nM and WI-38 respectively;  $EC_{50} = 57.1 \pm 3.0$  nM  
 $\pm$  SEM against VEGFR-2  $\pm$  SEM against VEGFR-2

**Fig. S6 (continued).** Antiproliferation and VEGFR-2 inhibitory properties of hydrazones **106a–k** and Sorafenib.

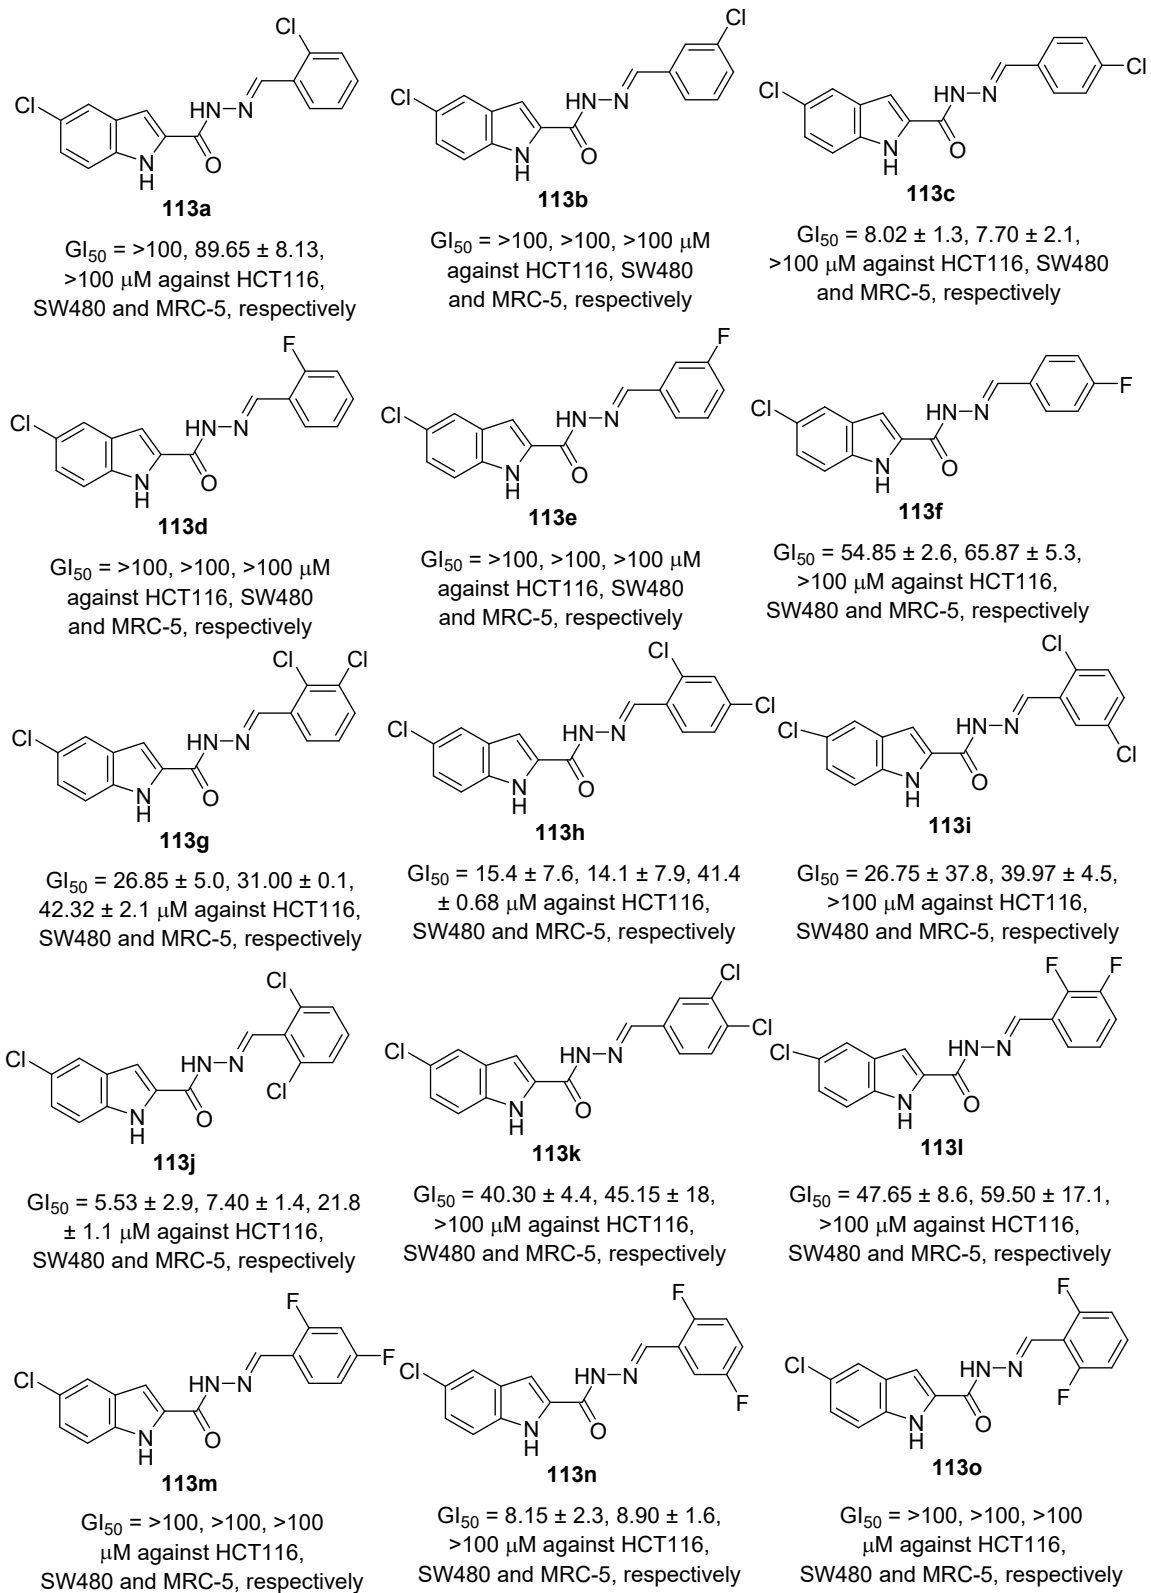

**Fig. S7.** Antiproliferation properties of indolyl hydrazones **113** and standard references (Cisplatin, Sorafenib and Sunitinib).

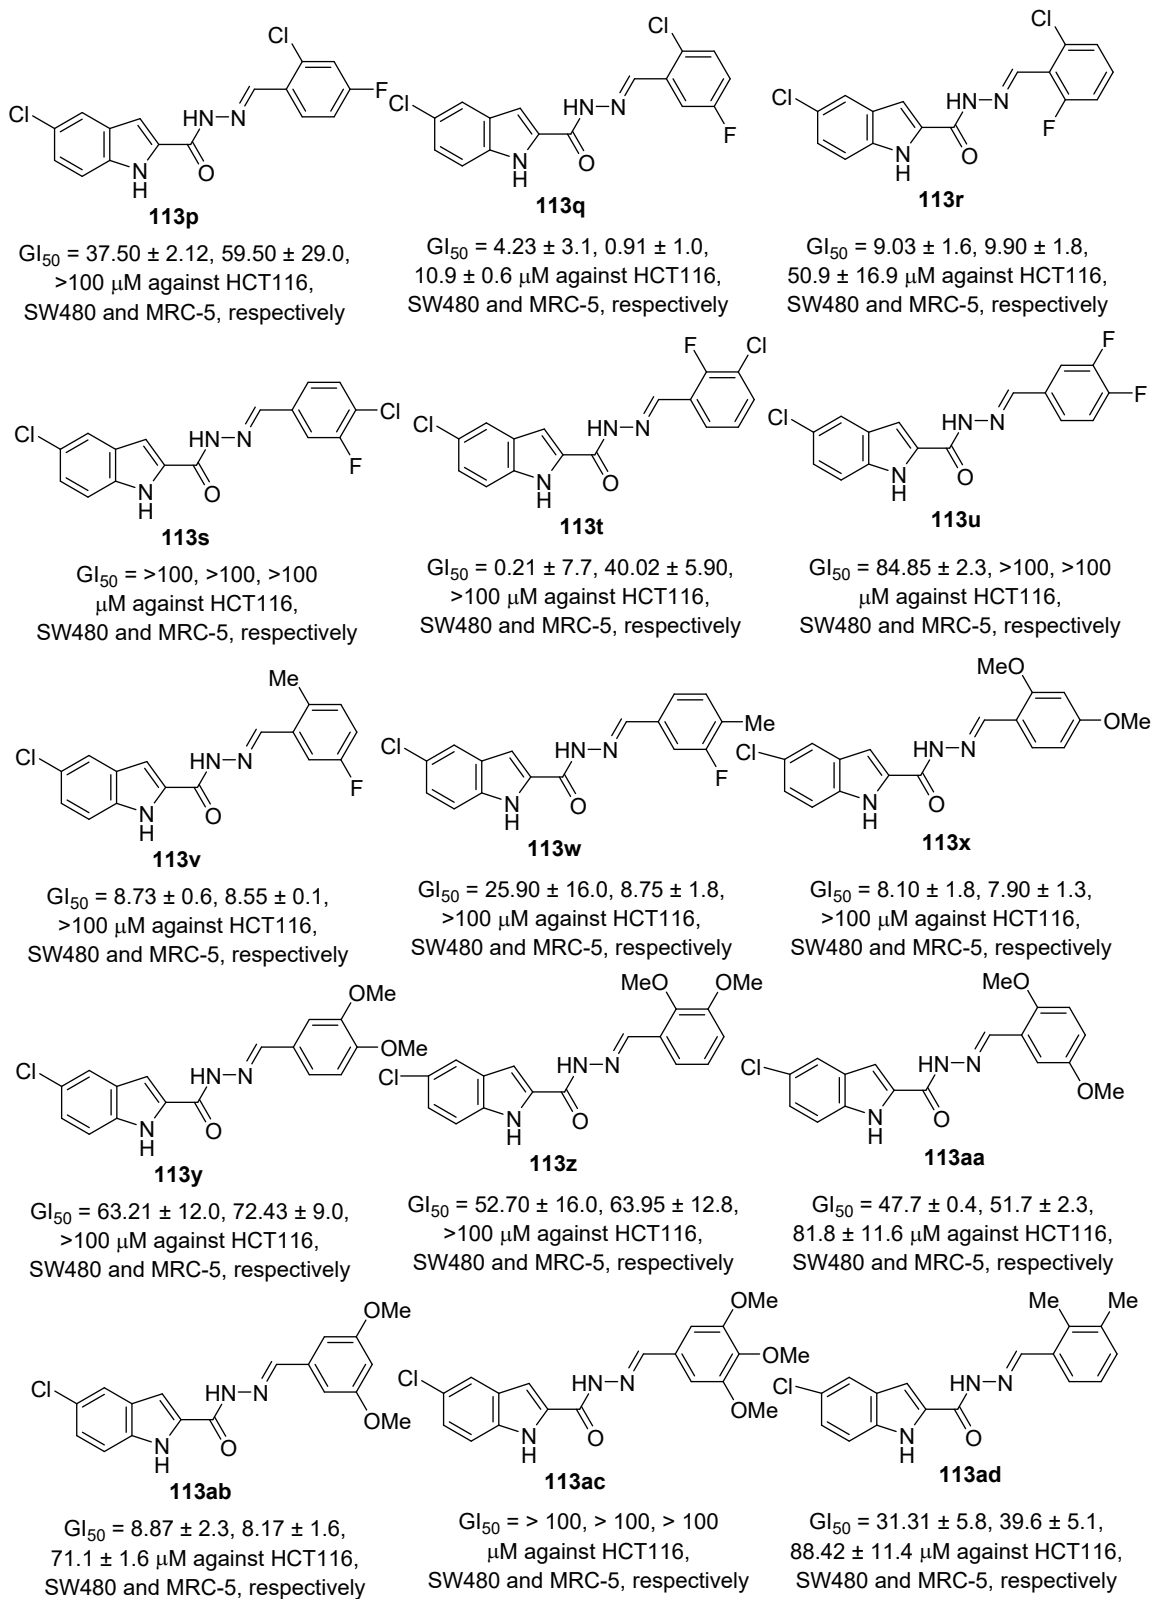

**Fig. S7 (continued).** Antiproliferation properties of indolyl hydrazones **113** and standard references (Cisplatin, Sorafenib and Sunitinib).



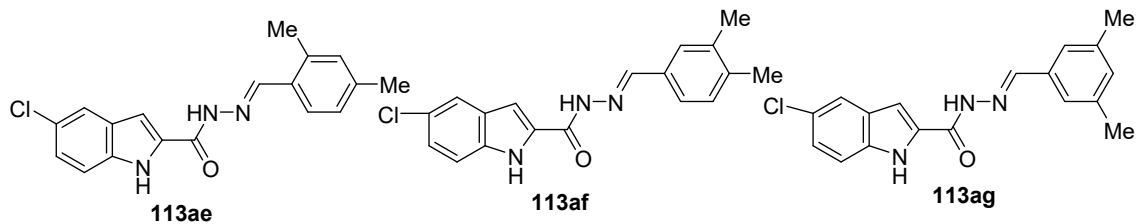

$GI_{50} = 0.79 \pm 0.1, 0.70 \pm 0.1, 65.30 \pm 0.3 \mu\text{M}$  against HCT116, SW480 and MRC-5, respectively

$GI_{50} = 11.6 \pm 7.8, 7.40 \pm 1.3, 10.02 \pm 0.04 \mu\text{M}$  against HCT116, SW480 and MRC-5, respectively

$GI_{50} = 35.10 \pm 1.8, 40.45 \pm 9.3, > 100 \mu\text{M}$  against HCT116, SW480 and MRC-5, respectively

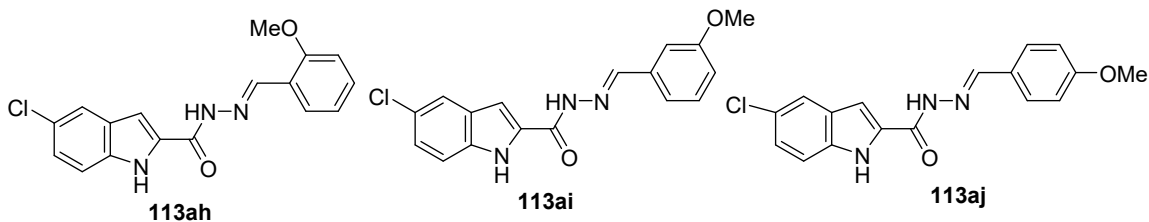

$GI_{50} = 0.93 \pm 0.3, 1.70 \pm 1.6, 0.94 \pm 0.04 \mu\text{M}$  against HCT116, SW480 and MRC-5, respectively

$GI_{50} = 9.47 \pm 3.0, 11.9 \pm 6.5, > 100 \mu\text{M}$  against HCT116, SW480 and MRC-5, respectively

$GI_{50} = > 100, > 100, > 100 \mu\text{M}$  against HCT116, SW480 and MRC-5, respectively

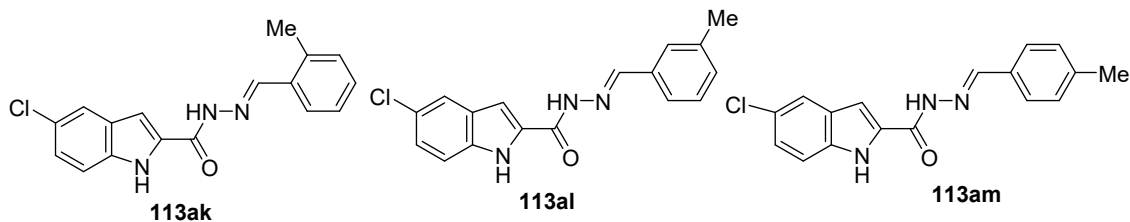

$GI_{50} = 36.15 \pm 9.7, 46.40 \pm 20.9, > 100 \mu\text{M}$  against HCT116, SW480 and MRC-5, respectively

$GI_{50} = 44.10 \pm 25.7, 44.10 \pm 18.0, > 100 \mu\text{M}$  against HCT116, SW480 and MRC-5, respectively

$GI_{50} = > 100, > 100, > 100 \mu\text{M}$  against HCT116, SW480 and MRC-5, respectively

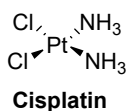

$GI_{50} = 7.67 \pm 3.4, 4.43 \pm 2.1, 3.82 \pm 1.9 \mu\text{M}$  against HCT116, SW480 and MRC-5, respectively

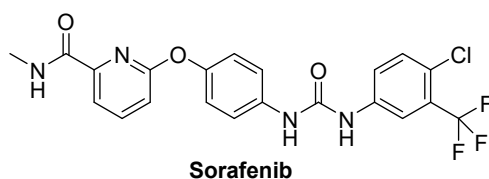

$GI_{50} = 4.17 \pm 2.5, 2.02 \pm 1.2, 30.81 \pm 10.6 \mu\text{M}$  against HCT116, SW480 and MRC-5, respectively

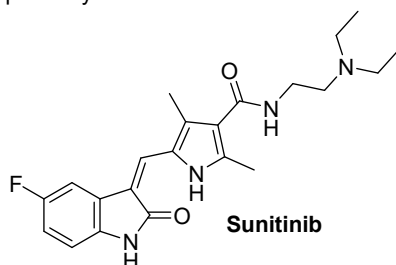

$GI_{50} = 15.84 \pm 1.7, 1.09 \pm 0.9, > 100 \mu\text{M}$  against HCT116, SW480 and MRC-5, respectively

**Fig. S7 (continued).** Antiproliferation properties of indolyl hydrazones **113** and standard references (Cisplatin, Sorafenib and Sunitinib).

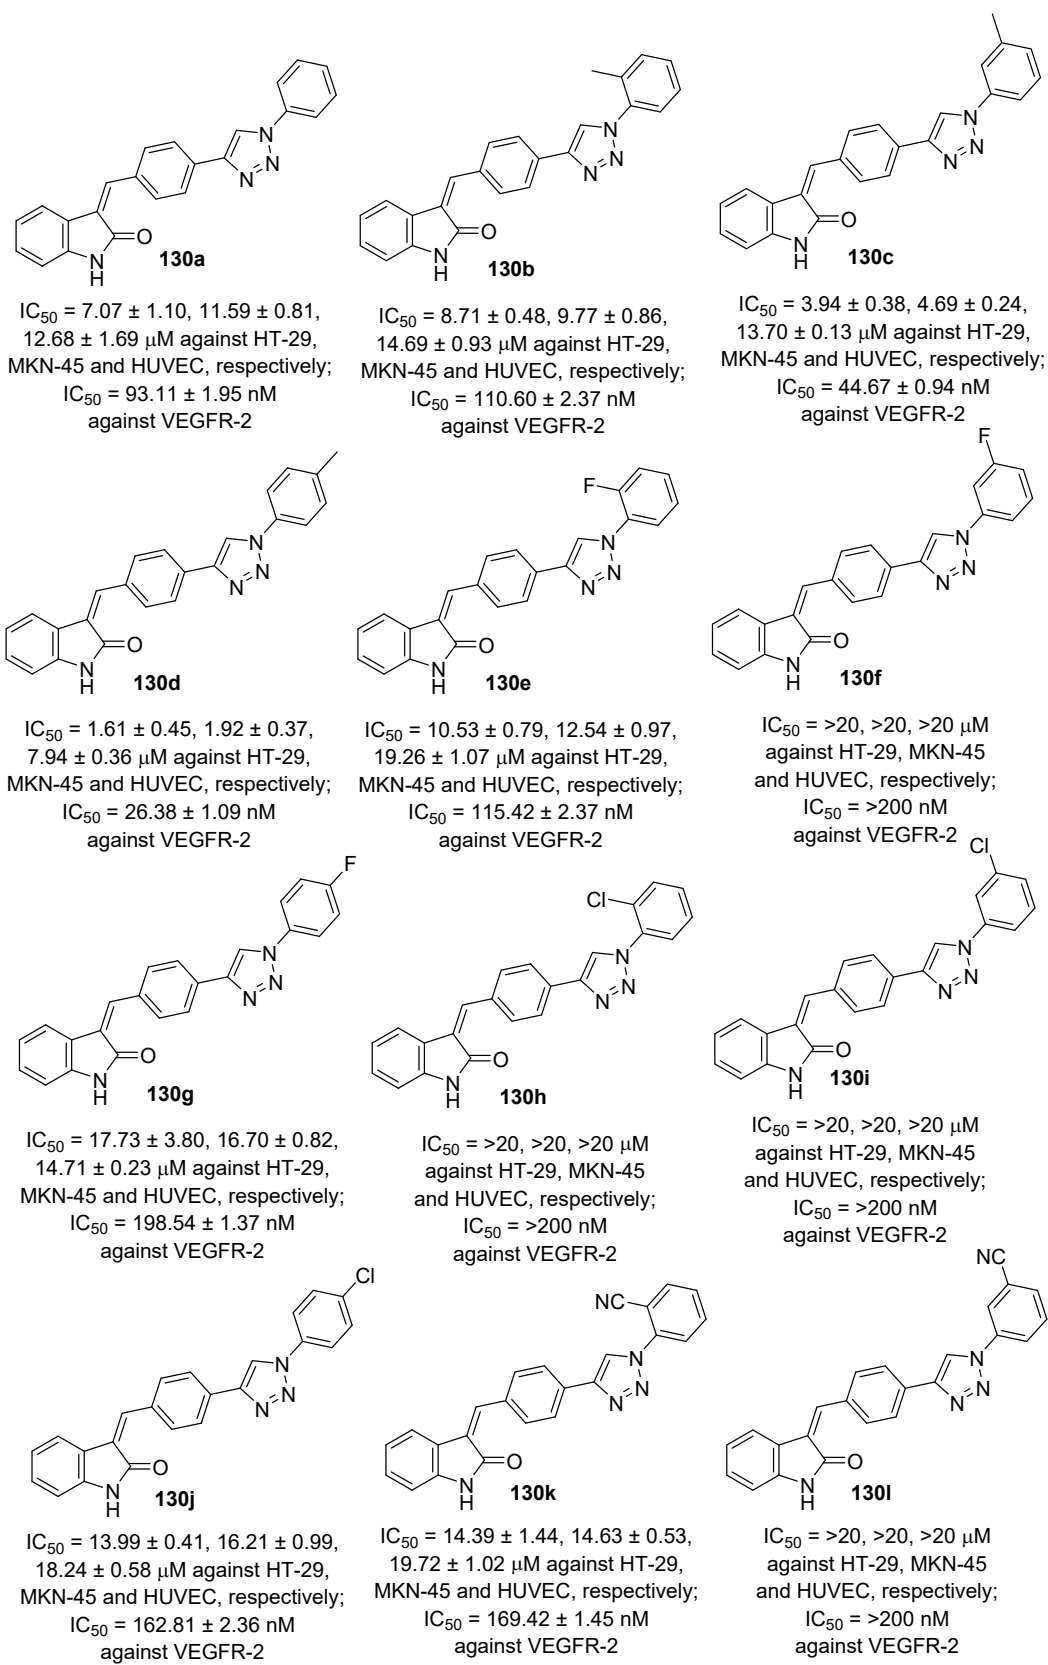

**Fig S8.** Antiproliferation and VEGFR-2 inhibitory properties of 2-oxoindolin-3-ylidenes **130** and Sunitinib.

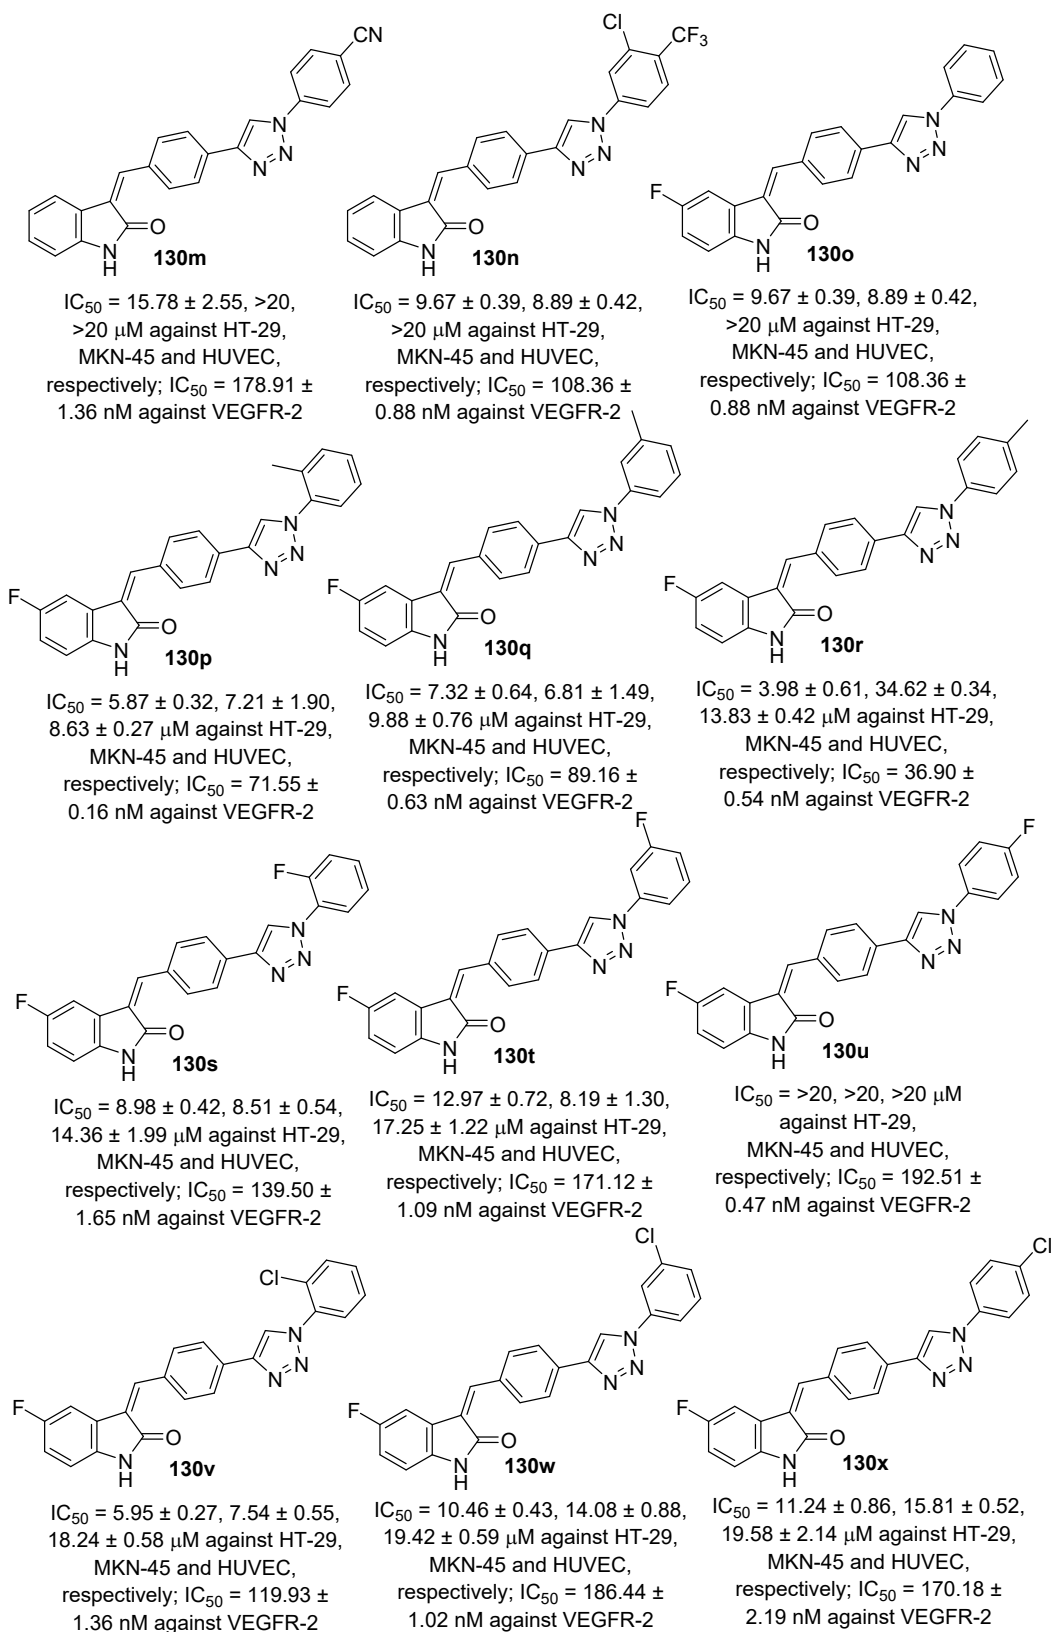

**Fig S8 (continued).** Antiproliferation and VEGFR-2 inhibitory properties of 2-oxoindolin-3-ylidenes **130** and Sunitinib.

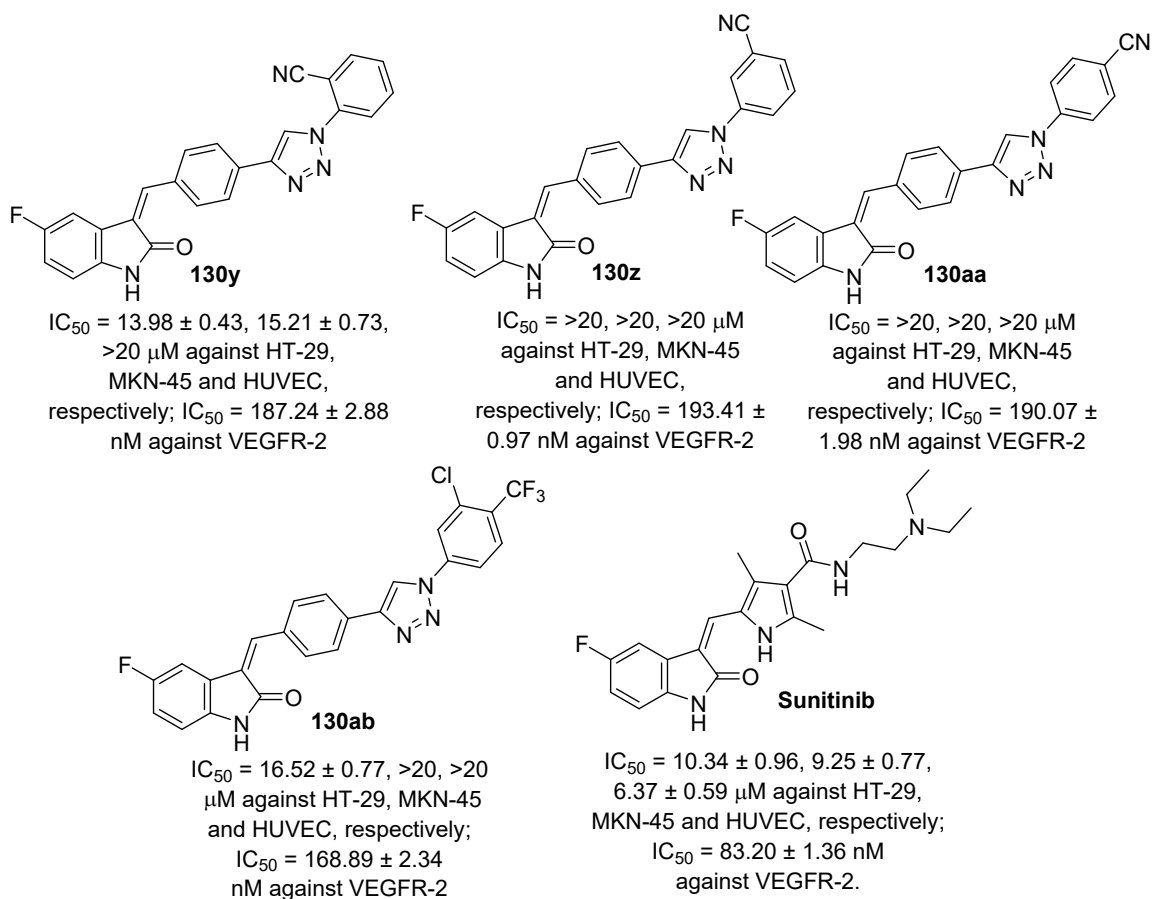

**Fig S8 (continued).** Antiproliferation and VEGFR-2 inhibitory properties of 2-oxoindolin-3-ylidenes **130** and Sunitinib.

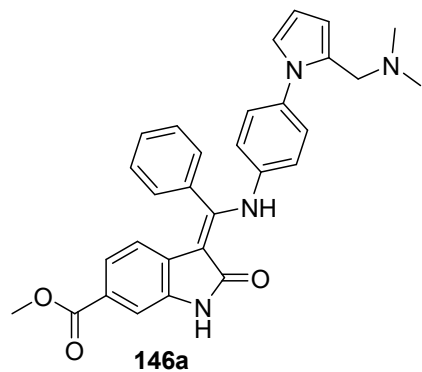

IC<sub>50</sub> = 51.7, 14.3 nM against VEGFR-2 and PDGFR-β, respectively; IC<sub>50</sub> = 0.98 ± 0.11, 5.22 ± 0.36, 53.25 ± 1.20 μM against HT-29, SK-OV-3 and HeLa cells, respectively.

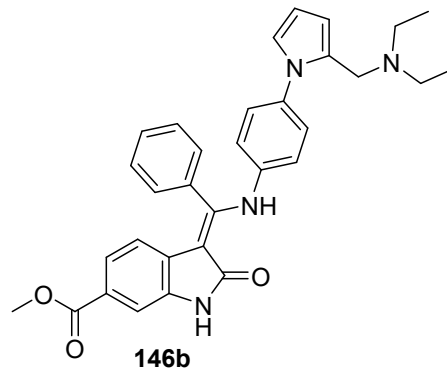

IC<sub>50</sub> = 164.62, 31.36 nM against VEGFR-2 and PDGFR-β, respectively

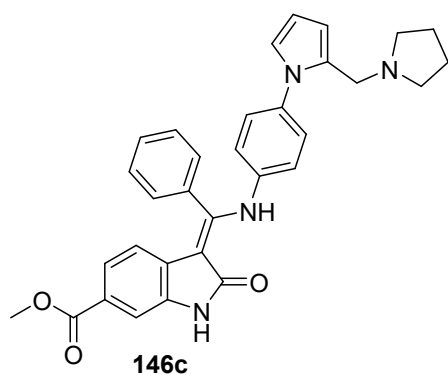

IC<sub>50</sub> = 152.71, 27.11 nM against VEGFR-2 and PDGFR-β, respectively

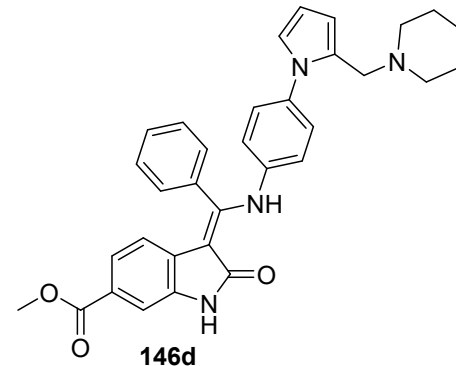

IC<sub>50</sub> = 137.51, 45.52 nM against VEGFR-2 and PDGFR-β, respectively

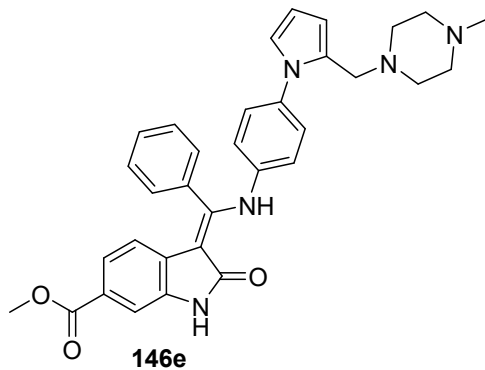

IC<sub>50</sub> = 38.0, 83.17 nM against VEGFR-2 and PDGFR-β, respectively; IC<sub>50</sub> = 3.12 ± 0.27, 25.87 ± 1.32, 30.42 ± 1.98 μM against HT-29, SK-OV-3 and HeLa cells, respectively.

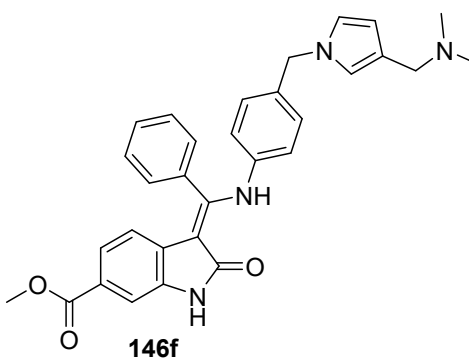

IC<sub>50</sub> = 167.51, 29.79 nM against VEGFR-2 and PDGFR-β, respectively

**Fig. S9.** Antiproliferation and enzymatic inhibitory properties of 2-oxoindolin-3-ylidene **146** and Nintedanib

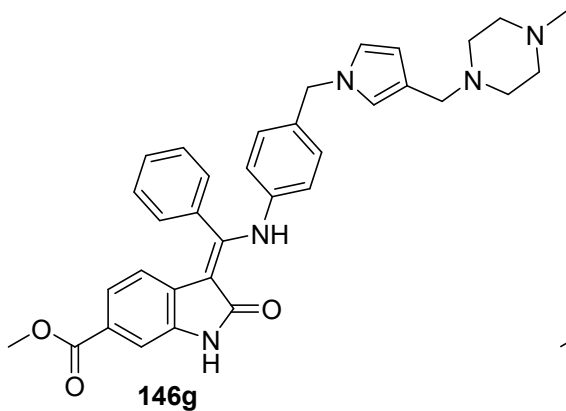

$IC_{50}$  = 164.54, 67.85 nM against VEGFR-2 and PDGFR- $\beta$ , respectively

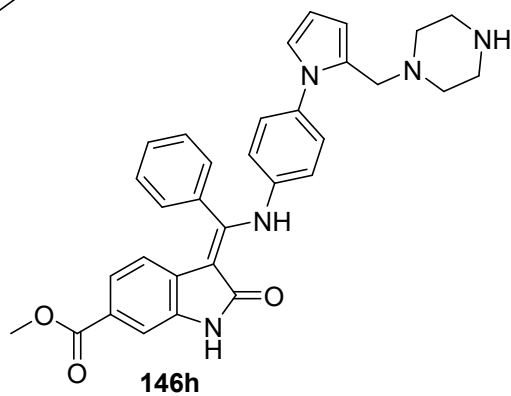

$IC_{50}$  = 96.22, 65.24 nM against VEGFR-2 and PDGFR- $\beta$ , respectively

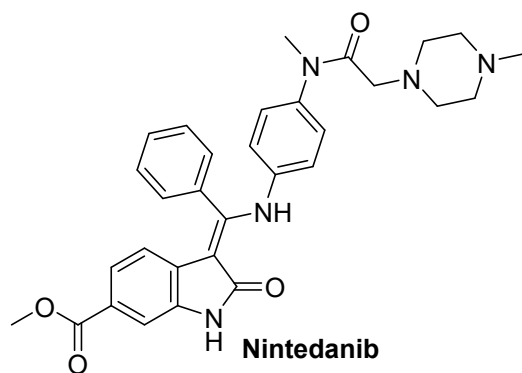

$IC_{50}$  = 3.3, 3.7 nM against VEGFR-2 and PDGFR- $\beta$ , respectively;  $IC_{50}$  =  $4.90 \pm 0.65$ ,  $28.76 \pm 2.13$ ,  $51.65 \pm 2.68$   $\mu$ M against HT-29, SK-OV-3 and HeLa cells, respectively.

**Fig. S9 (continued).** Antiproliferation and enzymatic inhibitory properties of 2-oxoindolin-3-ylidene **146** and Nintedanib

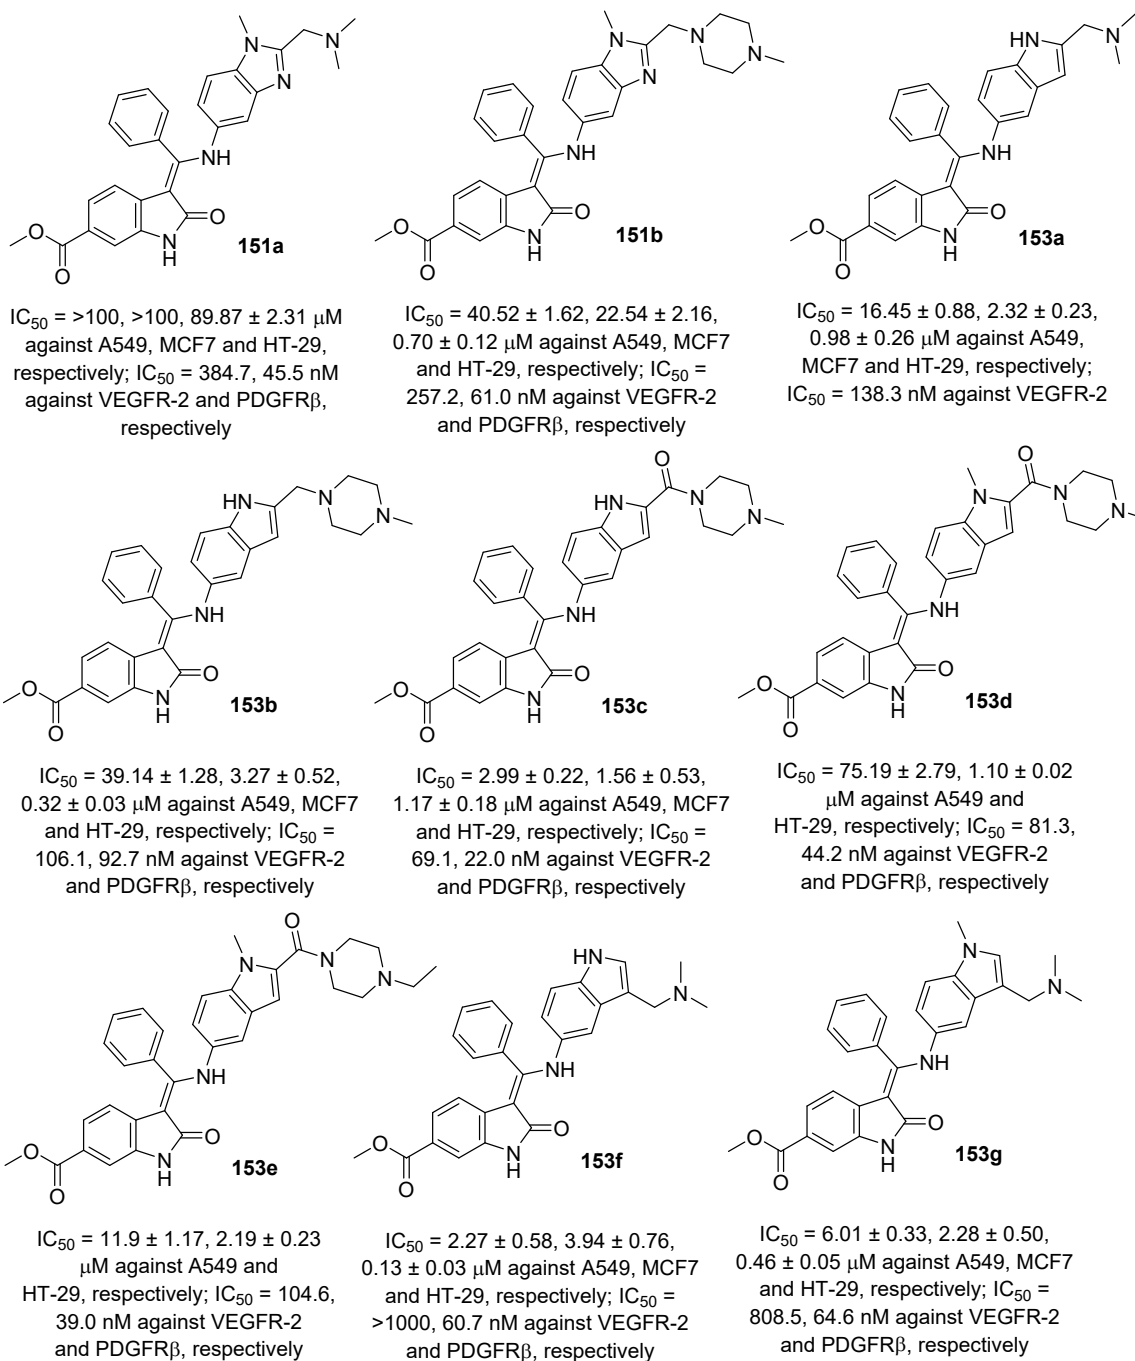

**Fig. S10.** Antiproliferation and enzymatic inhibitory properties of 2-oxoindolin-3-ylidenes **151**, **153** and Nintedanib.

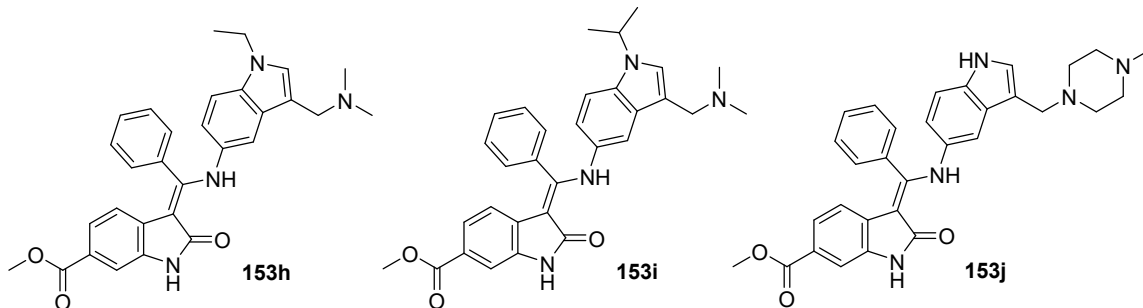

$IC_{50} = 7.63 \pm 0.69, 5.53 \pm 1.33,$   
 $6.79 \pm 2.07 \mu\text{M}$  against A549, MCF7  
 and HT-29, respectively;  $IC_{50} =$   
 $431.2, 34.3 \text{ nM}$  against VEGFR-2  
 and PDGFR $\beta$ , respectively

$IC_{50} = 4.32 \pm 0.06, 5.67 \pm 0.78,$   
 $0.25 \pm 0.05 \mu\text{M}$  against A549, MCF7  
 and HT-29, respectively;  $IC_{50} =$   
 $646.5, 49.2 \text{ nM}$  against VEGFR-2  
 and PDGFR $\beta$ , respectively

$IC_{50} = 7.40 \pm 1.32 \mu\text{M}$  against A549;  
 $IC_{50} = 135.1 \text{ nM}$  against PDGFR $\beta$ ;  
 % inhibition = 59 against VEGFR-2  
 at  $1 \mu\text{M}$

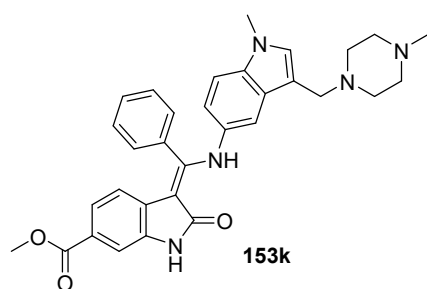

$IC_{50} = 6.15 \pm 1.07, 4.01 \pm 0.68,$   
 $0.87 \pm 0.12 \mu\text{M}$  against A549, MCF7  
 and HT-29, respectively;  $IC_{50} =$   
 $>1000, 91.7 \text{ nM}$  against VEGFR-2  
 and PDGFR $\beta$ , respectively

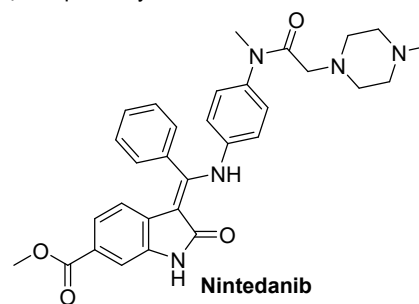

$IC_{50} = 22.62 \pm 1.57, 8.28 \pm 0.79,$   
 $0.83 \pm 0.37 \mu\text{M}$  against A549, MCF7  
 and HT-29, respectively;  $IC_{50} =$   
 $8.5, 3.5 \text{ nM}$  against VEGFR-2  
 and PDGFR $\beta$ , respectively

**Fig. S10 (continued).** Antiproliferation and enzymatic inhibitory properties of 2-oxoindolin-3-ylidenes **151**, **153** and Nintedanib.



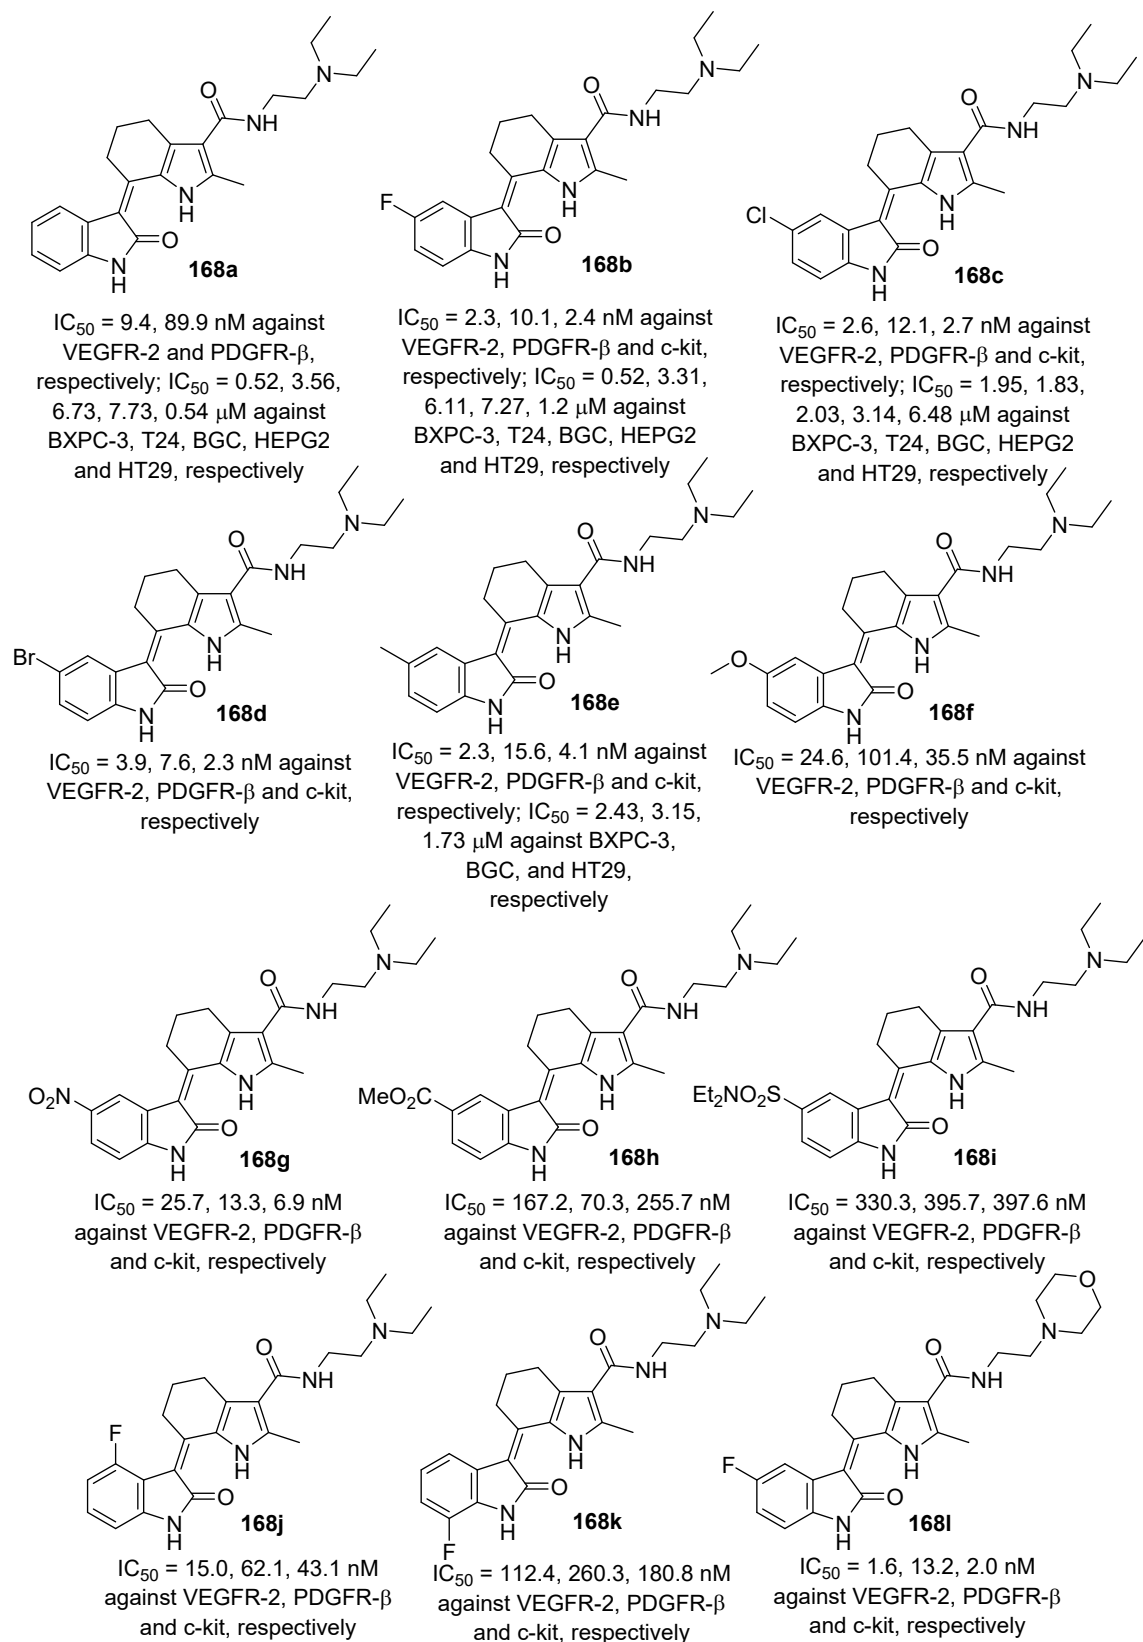

**Fig. S11.** Antiproliferation and enzymatic inhibitory properties of 2-oxoindolin-3-ylidenes **168** and Sunitinib.

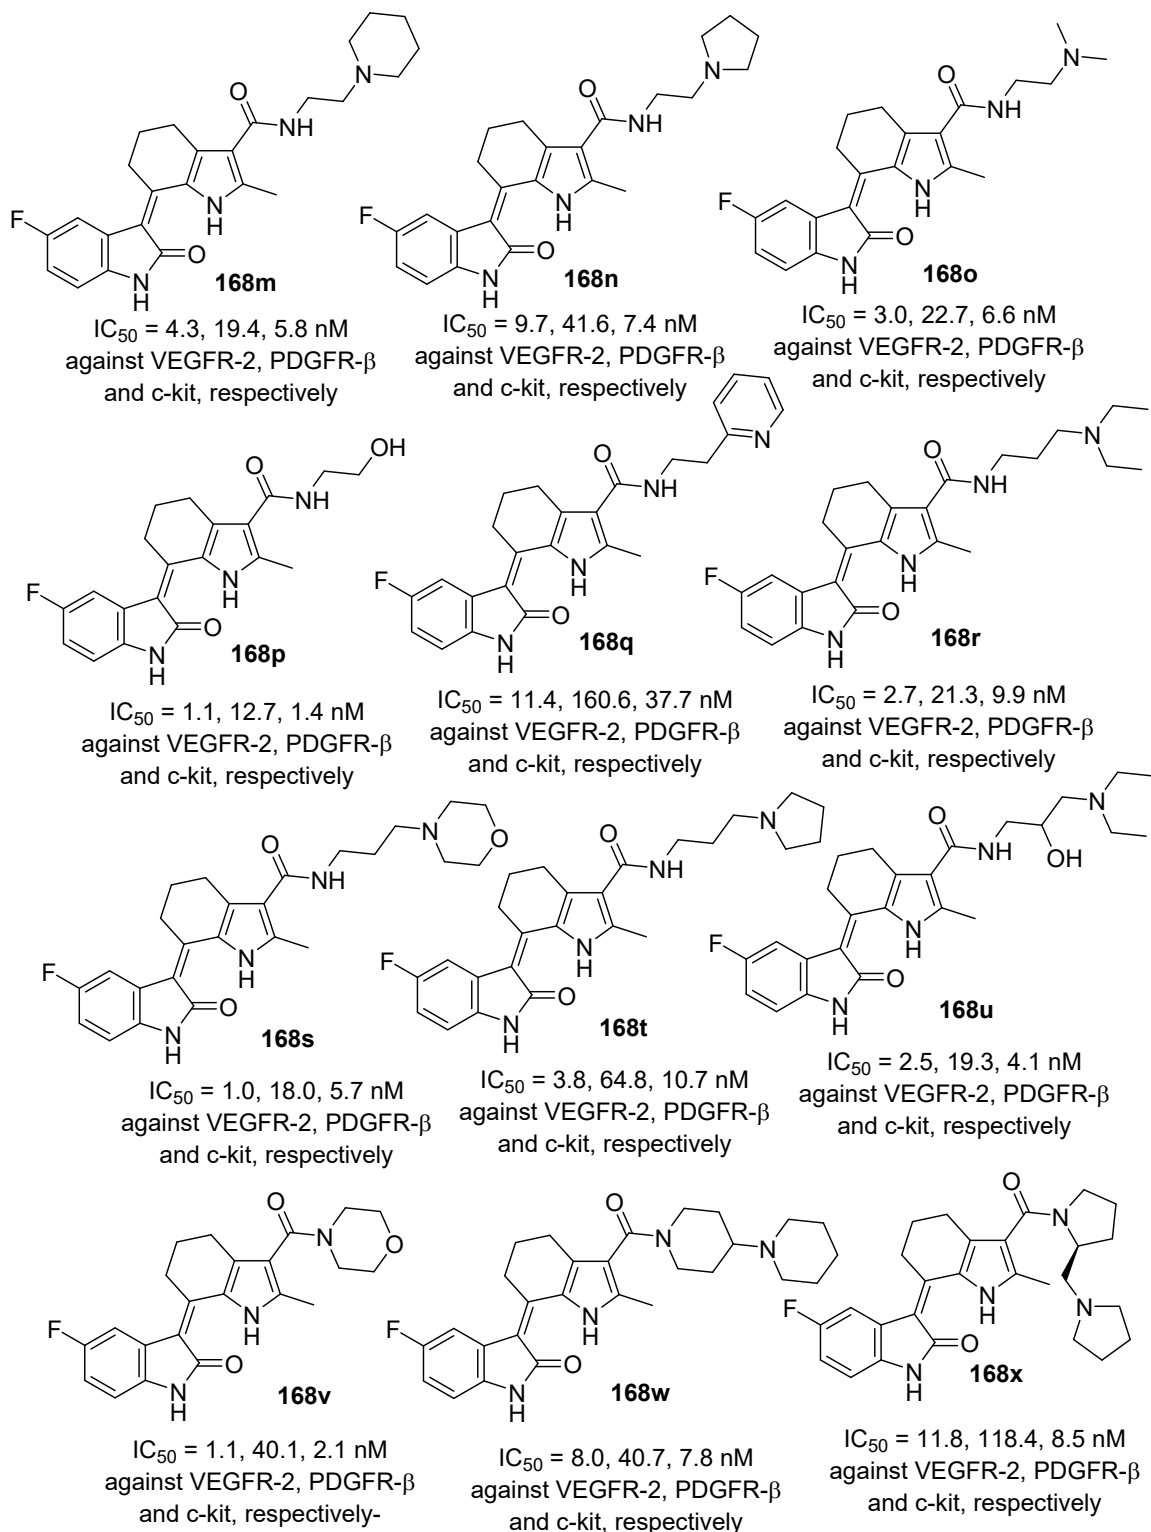

**Fig. S11 (continued).** Antiproliferation and enzymatic inhibitory properties of 2-oxoindolin-3-ylidenes **168** and Sunitinib.

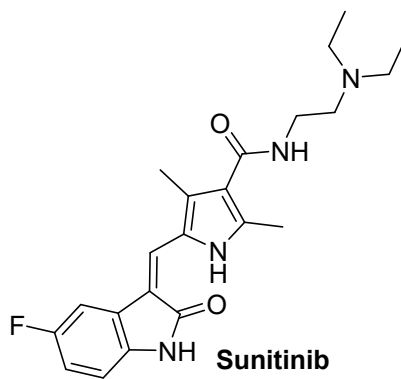

$IC_{50}$  = 4.0, 10.6, 8.9 nM against  
VEGFR-2, PDGFR- $\beta$  and c-kit,  
respectively;  $IC_{50}$  = 3.63, 2.44,  
4.78, 5.61, 1.47  $\mu$ M against  
BXPC-3, T24, BGC, HEPG2  
and HT29, respectively

**Fig. S11 (continued).** Antiproliferation and enzymatic inhibitory properties of 2-oxoindolin-3-ylidenes **168** and Sunitinib.

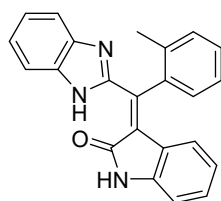

**172a**

IC<sub>50</sub> = 618, 97, 205 nM  
against VEGFR-1, VEGFR-2  
and FGFR-1, respectively

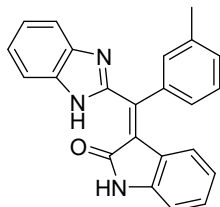

**172b**

IC<sub>50</sub> = 681, 119, 814 nM  
against VEGFR-1, VEGFR-2  
and FGFR-1, respectively

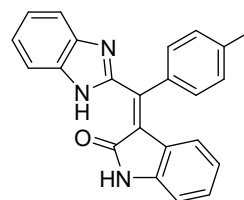

**172c**

IC<sub>50</sub> = 599, 88, 187 nM  
against VEGFR-1, VEGFR-2  
and FGFR-1, respectively

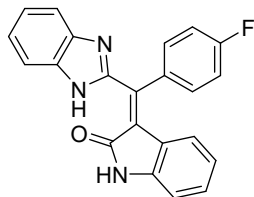

**172d**

IC<sub>50</sub> = 2308, 633, 950 nM  
against VEGFR-1, VEGFR-2  
and FGFR-1, respectively

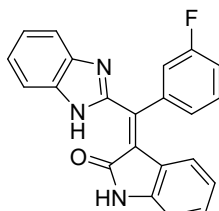

**172e**

IC<sub>50</sub> = 522, 125, 79 nM  
against VEGFR-1, VEGFR-2  
and FGFR-1, respectively

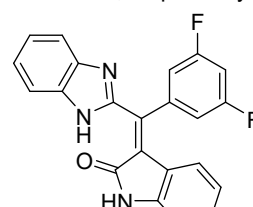

**172f**

IC<sub>50</sub> = 2551, 106, 4000 nM  
against VEGFR-1, VEGFR-2  
and FGFR-1, respectively

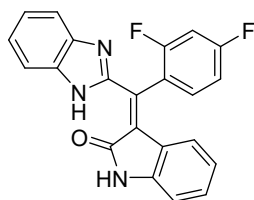

**172g**

IC<sub>50</sub> = 1796, 290, 628 nM  
against VEGFR-1, VEGFR-2  
and FGFR-1, respectively

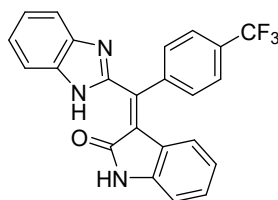

**172h**

IC<sub>50</sub> = 24000, 19903, 4899 nM  
against VEGFR-1, VEGFR-2  
and FGFR-1, respectively

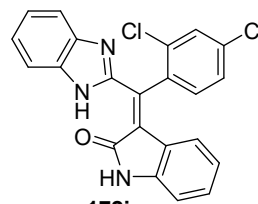

**172i**

IC<sub>50</sub> = 24400, 2180, 725 nM  
against VEGFR-1, VEGFR-2  
and FGFR-1, respectively

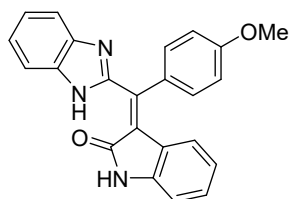

**172j**

IC<sub>50</sub> = 984, 327, 86 nM  
against VEGFR-1, VEGFR-2  
and FGFR-1, respectively

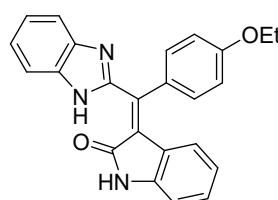

**172k**

IC<sub>50</sub> = 10543, 9876, 6293 nM  
against VEGFR-1, VEGFR-2  
and FGFR-1, respectively

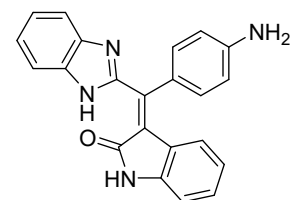

**172l**

IC<sub>50</sub> = 371, 68, 57 nM  
against VEGFR-1, VEGFR-2  
and FGFR-1, respectively

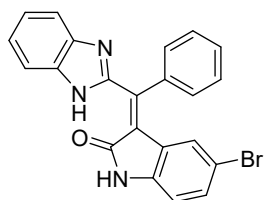

**172m**

IC<sub>50</sub> = 118, 51, 446 nM  
against VEGFR-1, VEGFR-2  
and FGFR-1, respectively

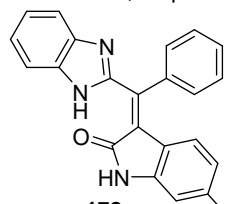

**172n**

IC<sub>50</sub> = 4544, 4880, 4880 nM  
against VEGFR-1, VEGFR-2  
and FGFR-1, respectively

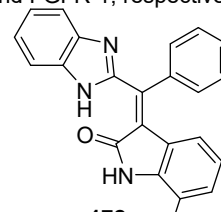

**172o**

IC<sub>50</sub> = 4880, 4880, 4880 nM  
against VEGFR-1, VEGFR-2  
and FGFR-1, respectively

**Fig. S12.** Enzymatic inhibitory properties of 2-oxoindolin-3-ylidenes **172**, **173** and standard references (Sunitinib and SU6668).

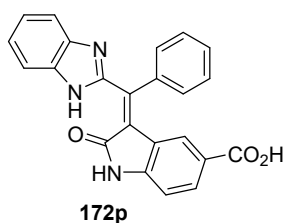

IC<sub>50</sub> = 39, 4, 75 nM  
against VEGFR-1, VEGFR-2  
and FGFR-1, respectively

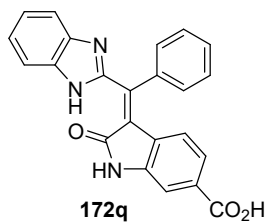

IC<sub>50</sub> = 582, 582, 1586 nM  
against VEGFR-1, VEGFR-2  
and FGFR-1, respectively

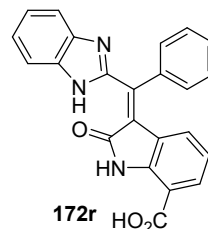

IC<sub>50</sub> = 20716, 23633, 24400 nM  
against VEGFR-1, VEGFR-2  
and FGFR-1, respectively

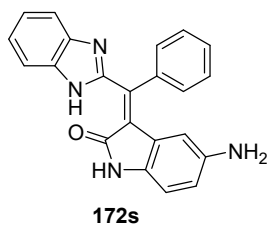

IC<sub>50</sub> = 201, 32, 13 nM  
against VEGFR-1, VEGFR-2  
and FGFR-1, respectively

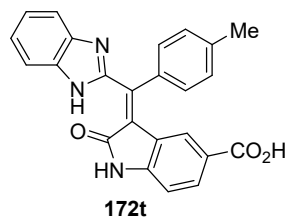

IC<sub>50</sub> = 45, 5, 67 nM  
against VEGFR-1, VEGFR-2  
and FGFR-1, respectively

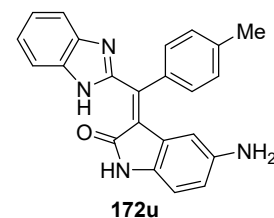

IC<sub>50</sub> = 473, 82, 51 nM  
against VEGFR-1, VEGFR-2  
and FGFR-1, respectively

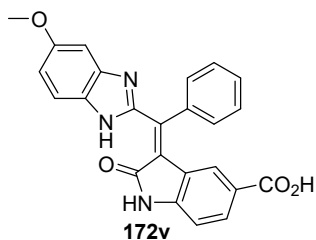

IC<sub>50</sub> = 77, 3, 39 nM  
against VEGFR-1, VEGFR-2  
and FGFR-1, respectively

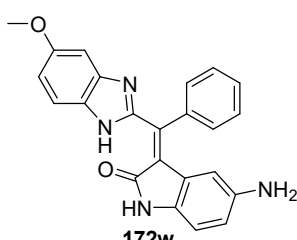

IC<sub>50</sub> = 377, 60, 42 nM  
against VEGFR-1, VEGFR-2  
and FGFR-1, respectively

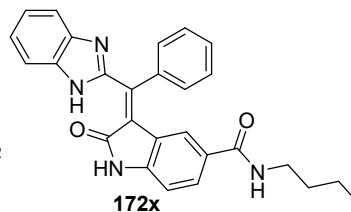

IC<sub>50</sub> = 374, 15, 326, 13 nM  
against VEGFR-1, VEGFR-2,  
FGFR-1 and PDGFR $\alpha$ , respectively

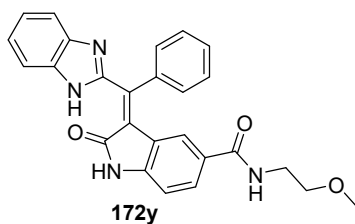

IC<sub>50</sub> = 381, 69, 199, 55 nM  
against VEGFR-1, VEGFR-2,  
FGFR-1 and PDGFR $\alpha$ , respectively

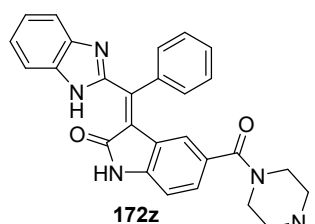

IC<sub>50</sub> = 4322, 157, 70 nM  
against VEGFR-1, VEGFR-2 and  
FGFR-1, respectively

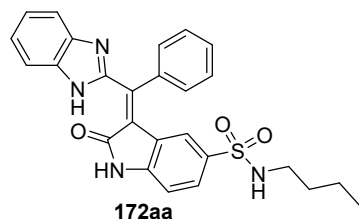

IC<sub>50</sub> = 24400, 1134, 300, 844 nM  
against VEGFR-1, VEGFR-2,  
FGFR-1 and PDGFR $\alpha$ , respectively

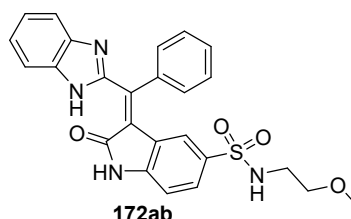

IC<sub>50</sub> = 1950, 660, 287, 614 nM  
against VEGFR-1, VEGFR-2,  
FGFR-1 and PDGFR $\alpha$ , respectively

**Fig. S12 (continued).** Enzymatic inhibitory properties of 2-oxoindolin-3-ylidenes **172**, **173** and standard references (Sunitinib and SU6668).

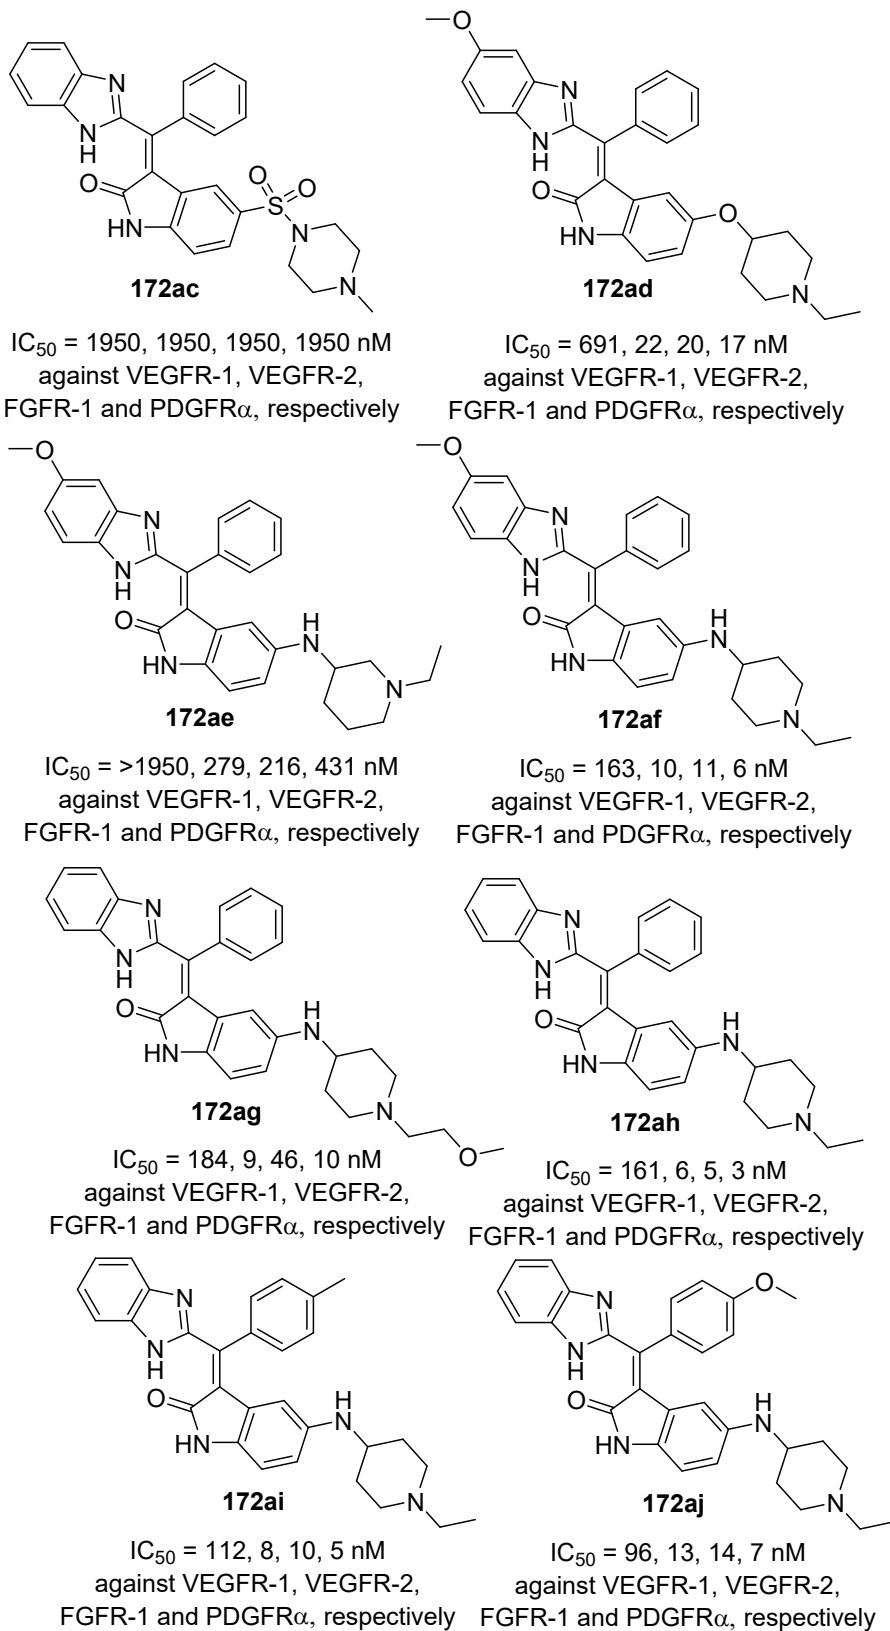

**Fig. S12 (continued).** Enzymatic inhibitory properties of 2-oxoindolin-3-ylidenes **172**, **173** and standard references (Sunitinib and SU6668).

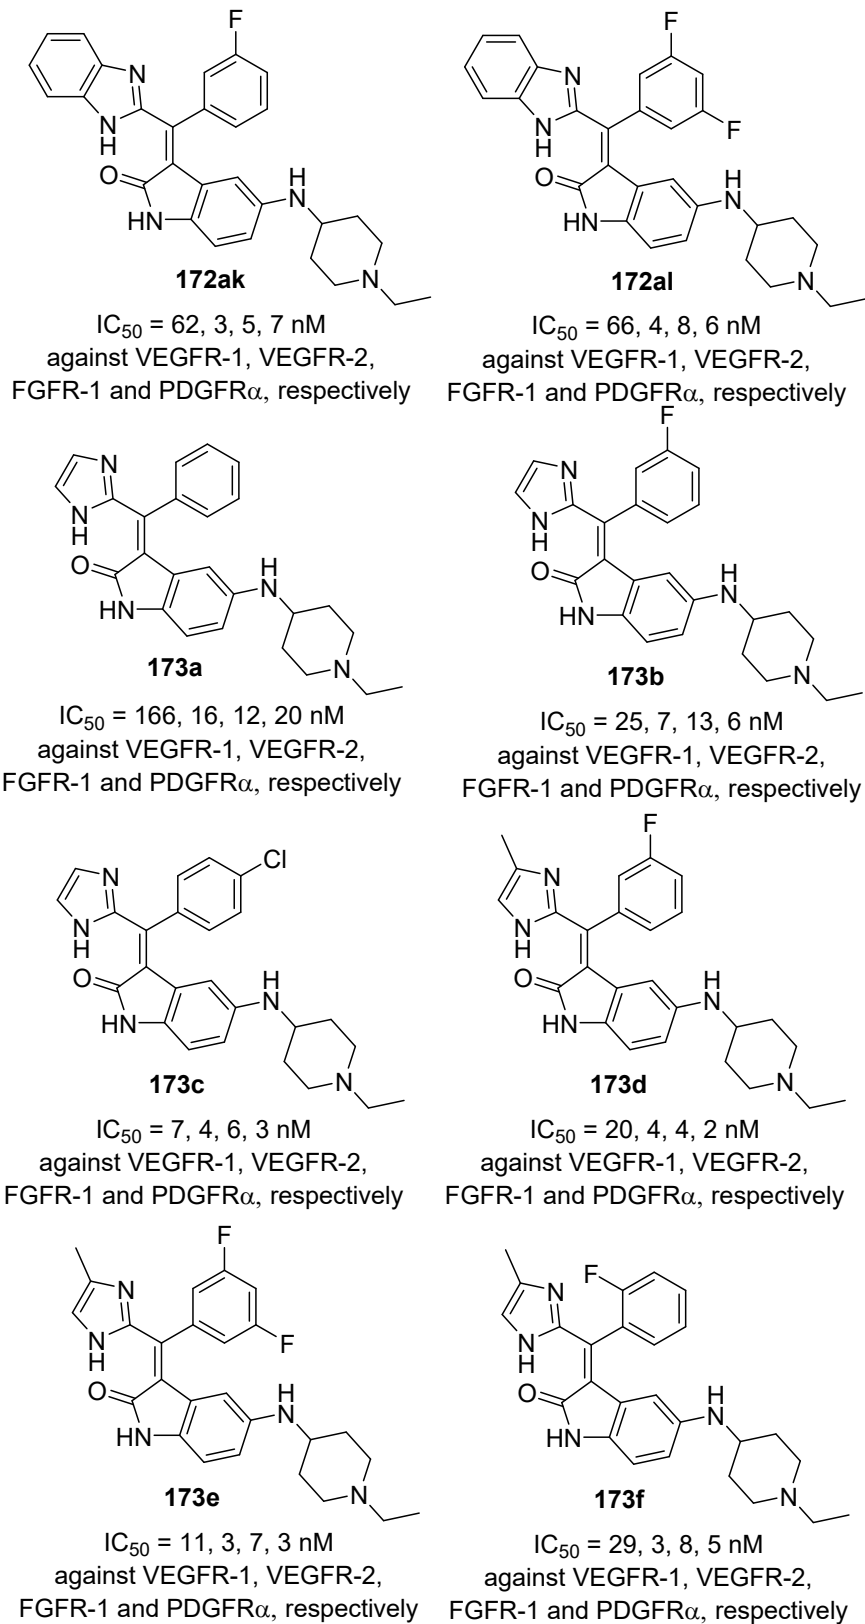

**Fig. S12 (continued).** Enzymatic inhibitory properties of 2-oxindolin-3-ylidenes **172**, **173** and standard references (Sunitinib and SU6668).

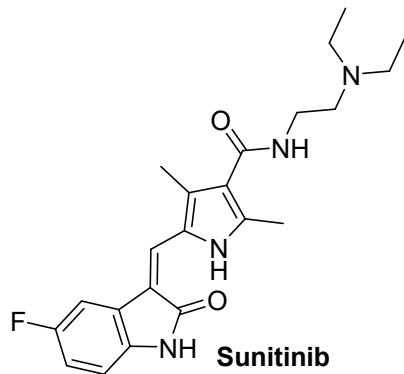

$IC_{50} = 1, 37, 1064$  nM  
against VEGFR-1, VEGFR-2  
and FGFR-1, respectively

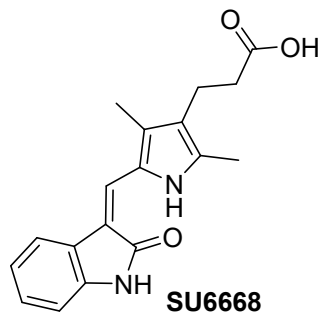

$IC_{50} = 28, 135, 1950$  nM  
against VEGFR-1, VEGFR-2  
and FGFR-1, respectively

**Fig. S12 (continued).** Enzymatic inhibitory properties of 2-oxoindolin-3-ylidenes **172**, **173** and standard references (Sunitinib and SU6668).



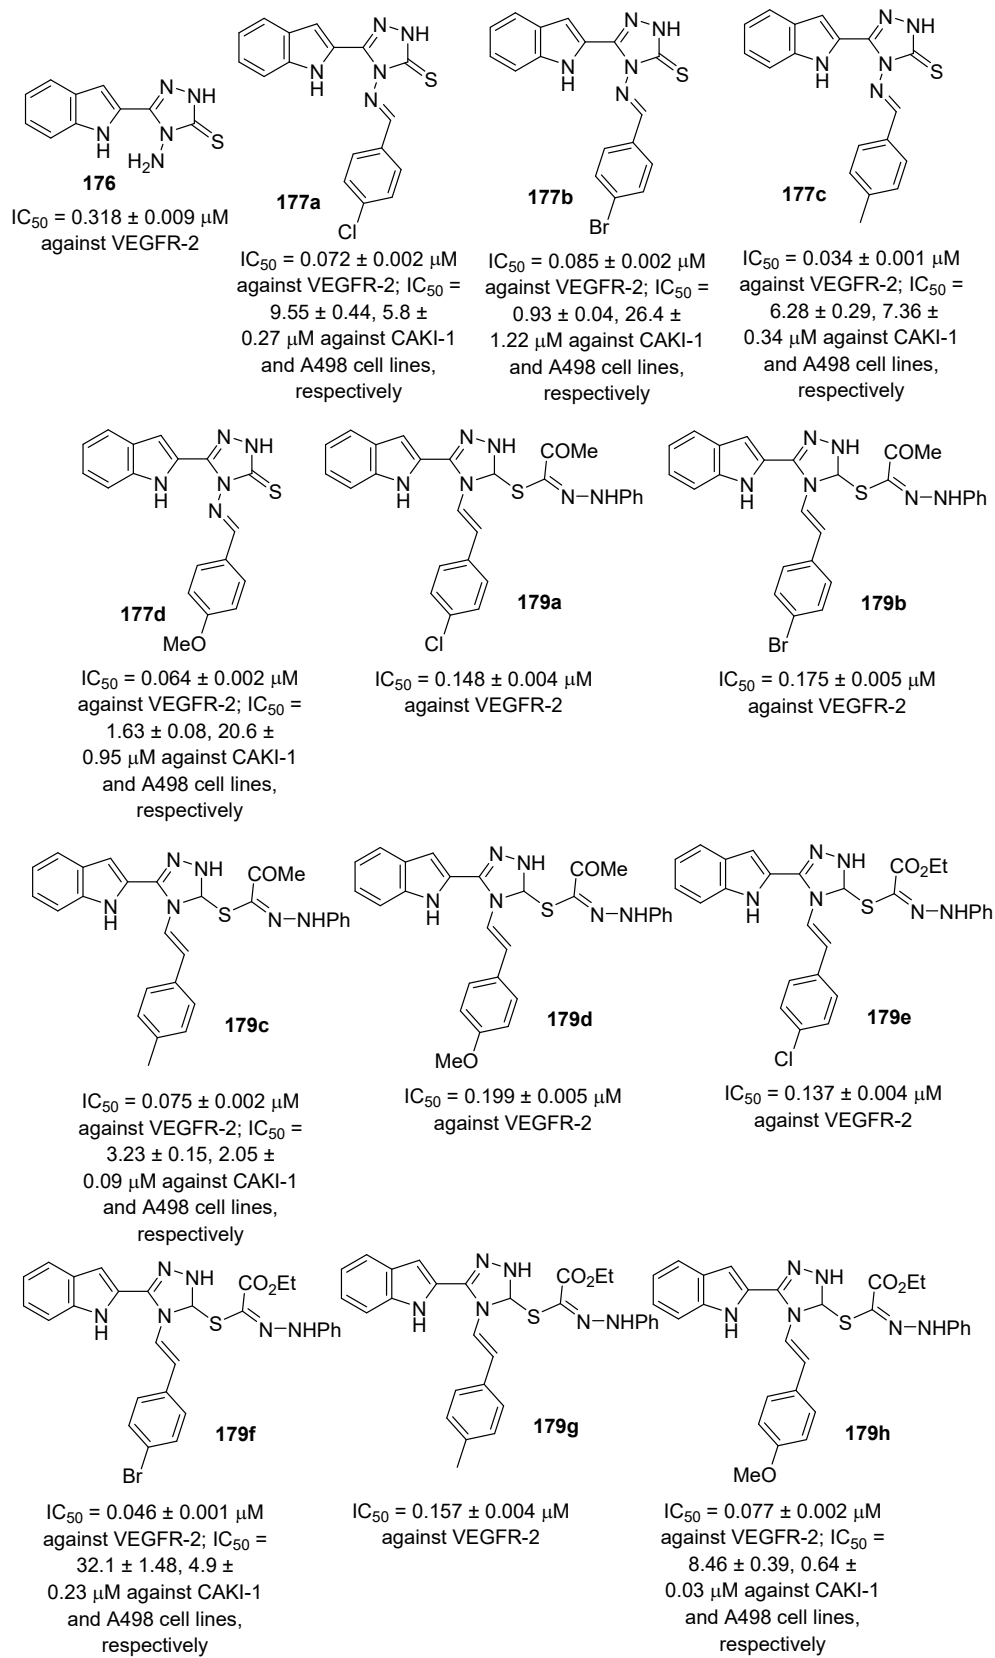

**Fig. S13.** VEGFR-2 inhibitory and antiproliferation properties of indole triazole conjugates **176**, **177**, **179**, **181** and Sunitinib.

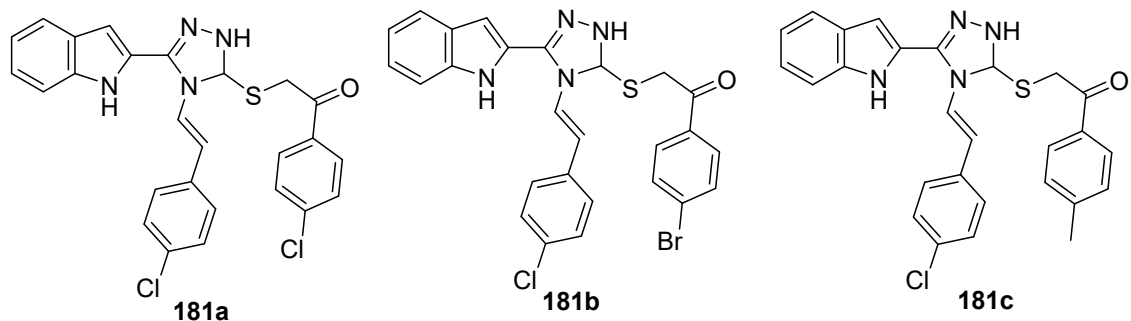

$IC_{50} = 0.248 \pm 0.007 \mu\text{M}$   
against VEGFR-2

$IC_{50} = 0.152 \pm 0.004 \mu\text{M}$   
against VEGFR-2

$IC_{50} = 0.108 \pm 0.003 \mu\text{M}$   
against VEGFR-2;  $IC_{50} =$   
 $2.03 \pm 0.09, 5.27 \pm$   
 $0.24 \mu\text{M}$  against CAKI-1  
and A498 cell lines,  
respectively

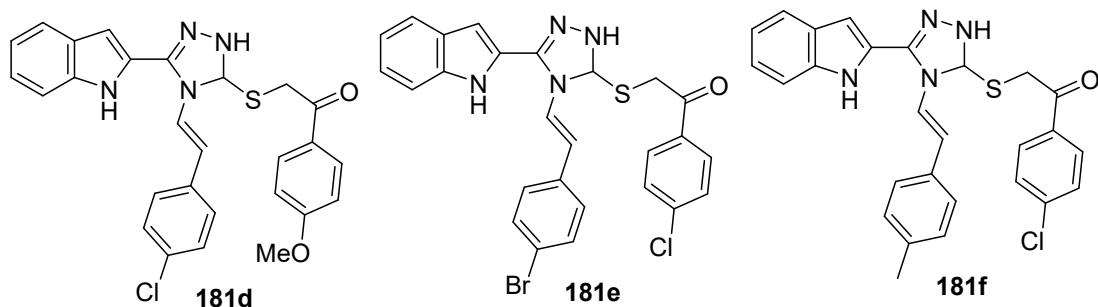

$IC_{50} = 0.256 \pm 0.007 \mu\text{M}$   
against VEGFR-2

$IC_{50} = 0.131 \pm 0.004 \mu\text{M}$   
against VEGFR-2

$IC_{50} = 0.258 \pm 0.007 \mu\text{M}$   
against VEGFR-2

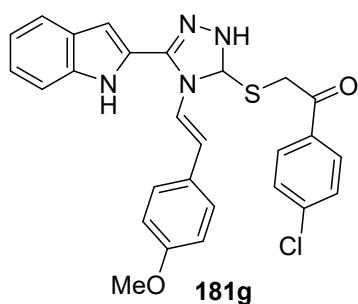

$IC_{50} = 0.071 \pm 0.002 \mu\text{M}$   
against VEGFR-2;  $IC_{50} =$   
 $0.89 \pm 0.04, 2.2 \pm$   
 $0.1 \mu\text{M}$  against CAKI-1  
and A498 cell lines,  
respectively

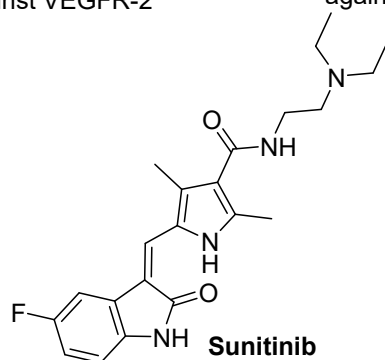

$IC_{50} = 0.075 \pm 0.002 \mu\text{M}$   
against VEGFR-2;  $IC_{50} =$   
 $4.93 \pm 0.16, 1.25 \pm$   
 $0.04 \mu\text{M}$  against CAKI-1  
and A498 cell lines,  
respectively

**Fig. S13 (continued).** VEGFR-2 inhibitory and antiproliferation properties of indole triazole conjugates **176**, **177**, **179**, **181** and Sunitinib.

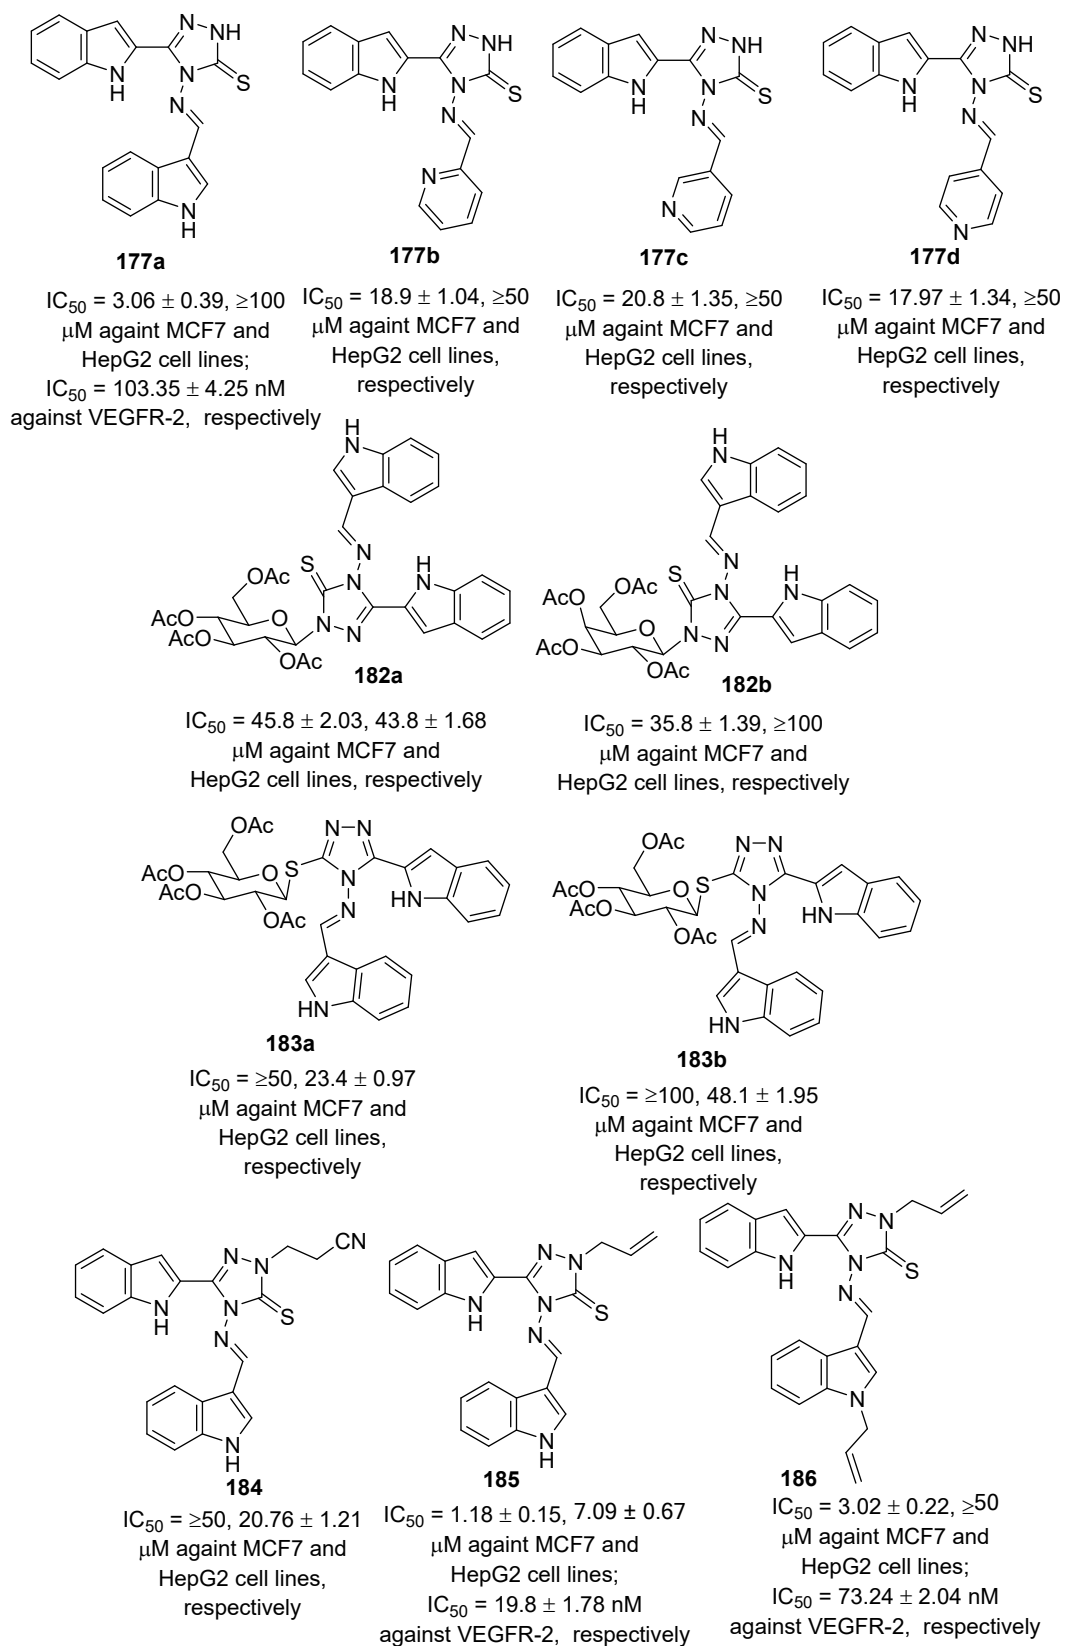

**Fig. S14.** Antiproliferation and VEGFR-2 inhibitory properties of indole triazole conjugates **177**, **183–186** and standard references.

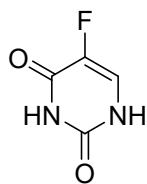

**5- Fluorouracil**

$IC_{50} = 5.81 \pm 0.65, 6.98 \pm 0.26$   $\mu$ M against MCF7 and HepG2 cell lines respectively

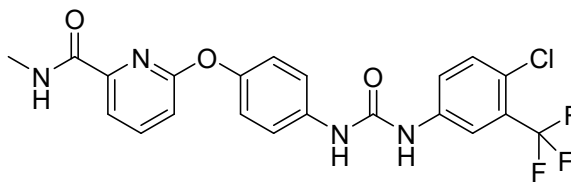

**Sorafenib**

$IC_{50} = 2.13 \pm 0.24, 3.24 \pm 0.23$   $\mu$ M against MCF7 and HepG2 cell lines;  
 $IC_{50} = 30.0$  nM against VEGFR-2, respectively

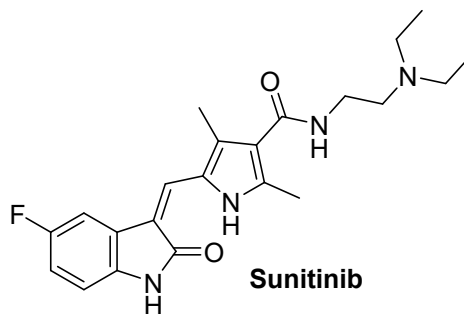

**Sunitinib**

$IC_{50} = 75.0$  nM against VEGFR-2

**Fig. S14 (continued).** Antiproliferation and VEGFR-2 inhibitory properties of indole triazole conjugates **177**, **183–186** and standard references.

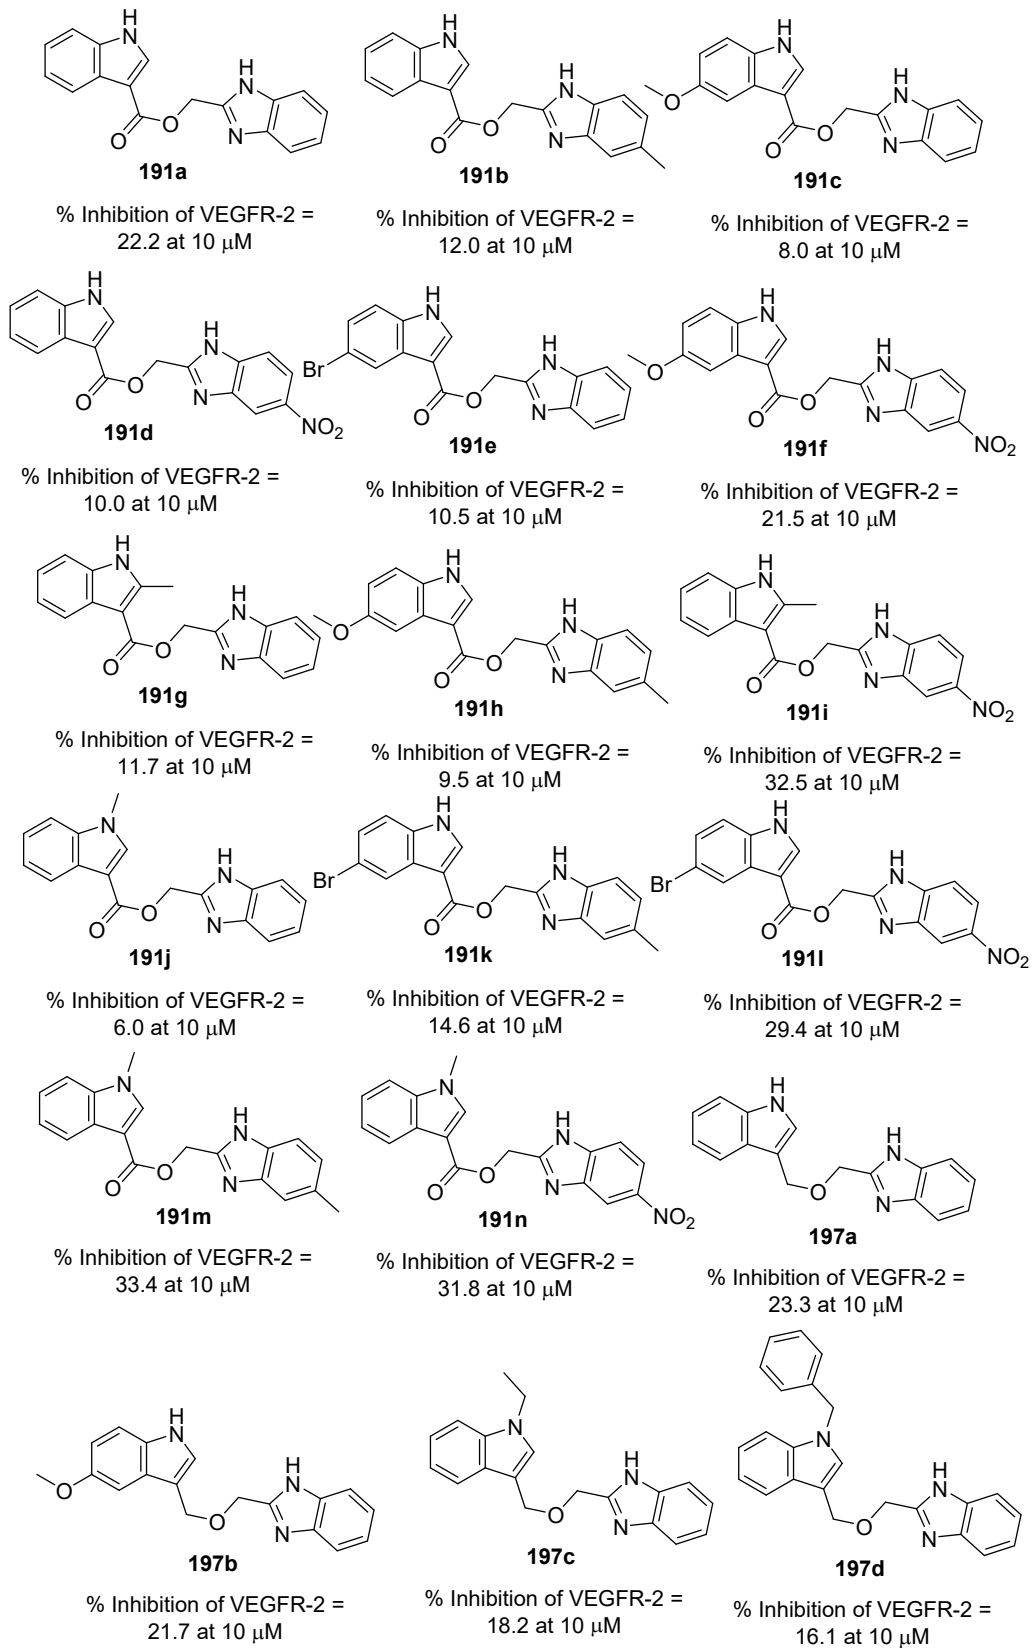

**Fig. S15.** % Inhibitory properties of VEGFR-2 by indole benzimidazole conjugates **191** and **197** at 10  $\mu$ M.

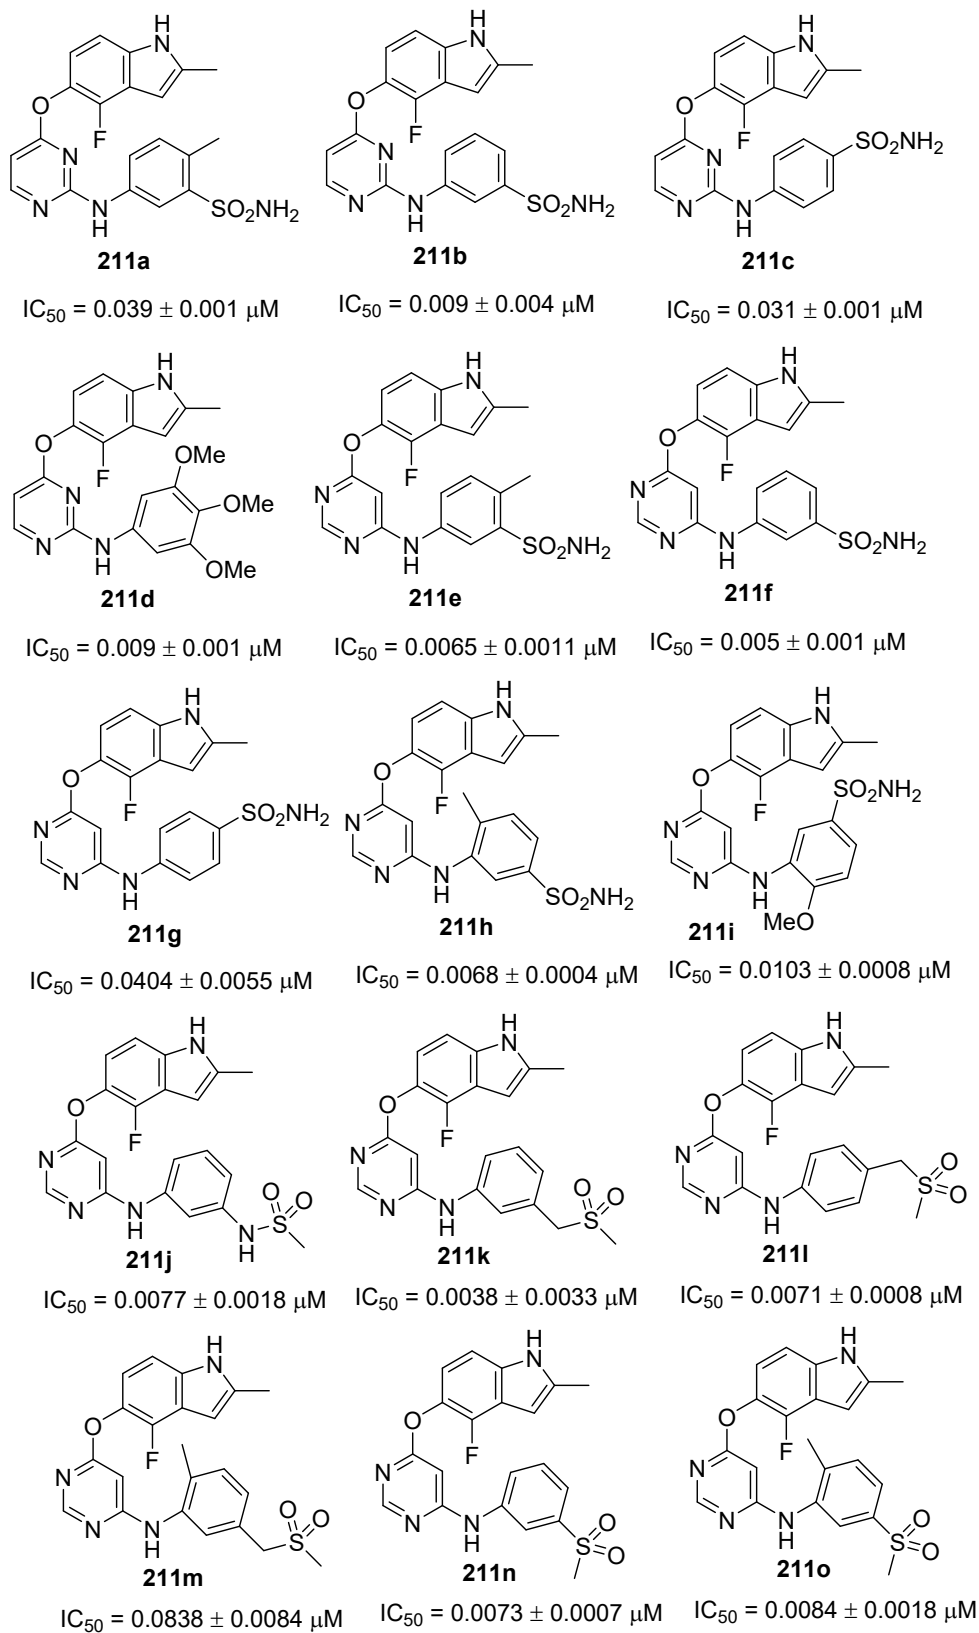

**Fig. S16.** Inhibitory properties of VEGFR-2 by indole-pyrimidine conjugates **211** and Sunitinib.

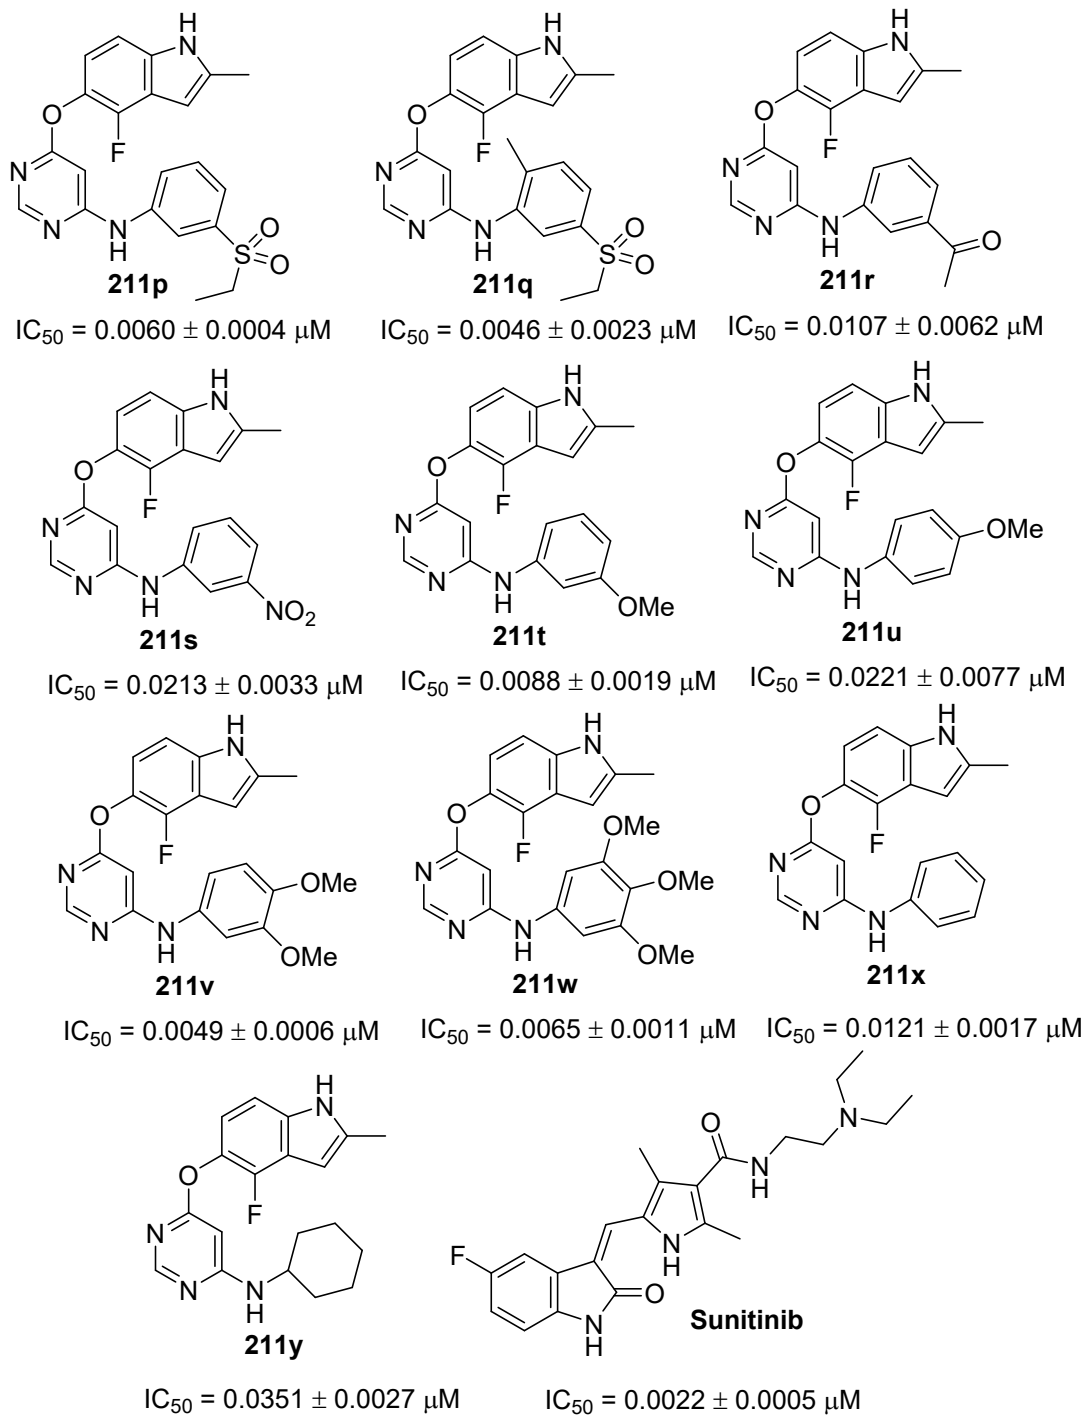

**Fig. S16 (continued).** Inhibitory properties of VEGFR-2 by indole-pyrimidine conjugates **211** and Sunitinib.

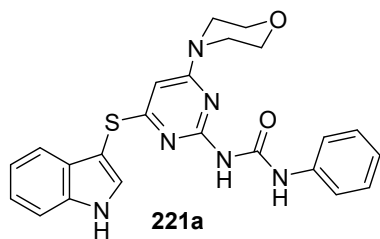

$IC_{50} = 26.12 \pm 2.12, 14.13 \pm 1.81, 12.14 \pm 1.21, 7.14 \pm 0.62 \mu\text{M}$  against A549, PC-3, MDAMB-231 and HepG2, respectively; % inhibition =  $1.21 \pm 0.14$  of VEGFR-2 at  $10 \mu\text{M}$

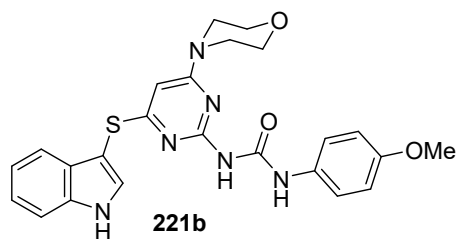

$IC_{50} = 33.40 \pm 5.16, 12.46 \pm 2.11, 7.94 \pm 0.92, 10.26 \pm 0.81 \mu\text{M}$  against A549, PC-3, MDAMB-231 and HepG2, respectively; % inhibition =  $1.92 \pm 0.15$  of VEGFR-2 at  $10 \mu\text{M}$

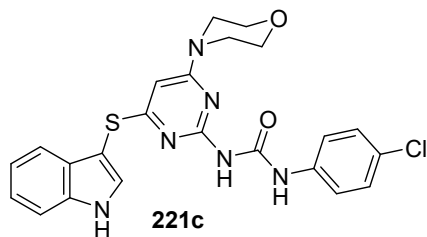

$IC_{50} = 21.83 \pm 1.66, 28.44 \pm 3.01, 6.93 \pm 0.51, 22.47 \pm 1.27 \mu\text{M}$  against A549, PC-3, MDAMB-231 and HepG2, respectively; % inhibition =  $1.44 \pm 0.21$  of VEGFR-2 at  $10 \mu\text{M}$

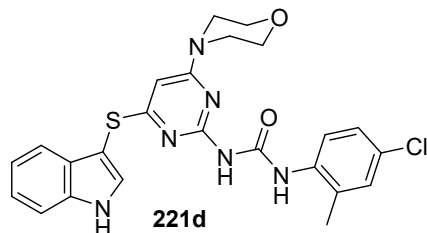

$IC_{50} = >50, 33.81 \pm 2.51, 8.65 \pm 0.62, 8.26 \pm 0.97 \mu\text{M}$  against A549, PC-3, MDAMB-231 and HepG2, respectively; % inhibition =  $0.35 \pm 0.11$  of VEGFR-2 at  $10 \mu\text{M}$

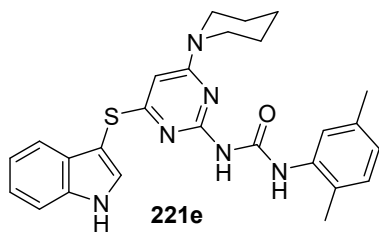

$IC_{50} = 25.40 \pm 3.54, >50, 5.94 \pm 0.81, 6.44 \pm 0.44 \mu\text{M}$  against A549, PC-3, MDAMB-231 and HepG2, respectively; % inhibition =  $0.31 \pm 0.07$  of VEGFR-2 at  $10 \mu\text{M}$

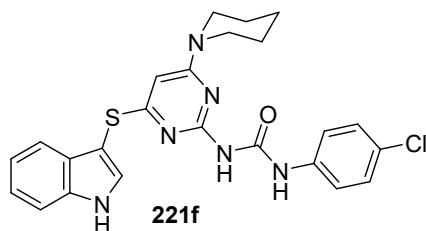

$IC_{50} = 18.62 \pm 1.44, 42.54 \pm 5.21, 10.13 \pm 1.21, 14.81 \pm 1.89 \mu\text{M}$  against A549, PC-3, MDAMB-231 and HepG2, respectively; % inhibition =  $1.82 \pm 0.21$  of VEGFR-2 at  $10 \mu\text{M}$

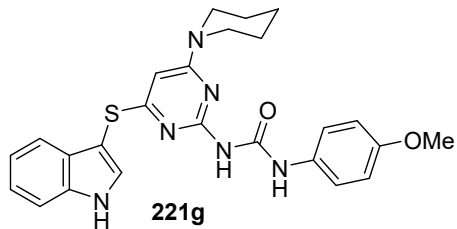

$IC_{50} = 13.47 \pm 0.97, 17.40 \pm 2.11, 7.26 \pm 1.12, 17.12 \pm 1.11 \mu\text{M}$  against A549, PC-3, MDAMB-231 and HepG2, respectively; % inhibition =  $1.13 \pm 0.24$  of VEGFR-2 at  $10 \mu\text{M}$

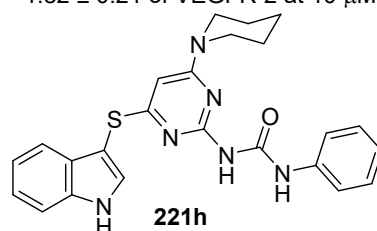

$IC_{50} = 33.13 \pm 2.68, 12.13 \pm 1.16, 8.13 \pm 1.14, 20.86 \pm 0.91 \mu\text{M}$  against A549, PC-3, MDAMB-231 and HepG2, respectively; % inhibition =  $4.55 \pm 0.32$  of VEGFR-2 at  $10 \mu\text{M}$

**Fig. S17.** Antiproliferation and inhibitory properties of VEGFR-2 for indole pyrimidine conjugates **221** and Sorafenib.



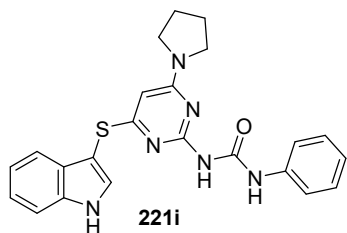

$IC_{50} = 21.24 \pm 1.51, 14.93 \pm 0.92, 7.89 \pm 0.69, 11.44 \pm 1.22 \mu\text{M}$  against A549, PC-3, MDAMB-231 and HepG2, respectively; % inhibition =  $3.23 \pm 0.28$  of VEGFR-2 at  $10 \mu\text{M}$

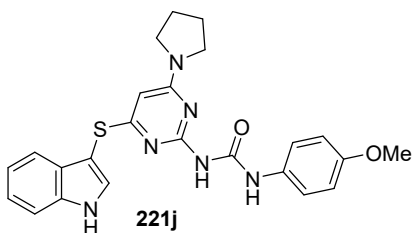

$IC_{50} = 11.82 \pm 0.96, 21.48 \pm 1.12, 13.10 \pm 0.92, 20.26 \pm 1.17 \mu\text{M}$  against A549, PC-3, MDAMB-231 and HepG2, respectively; % inhibition =  $2.61 \pm 0.33$  of VEGFR-2 at  $10 \mu\text{M}$

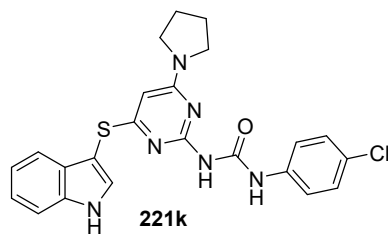

$IC_{50} = 6.41 \pm 0.81, 10.42 \pm 0.78, 5.85 \pm 0.71, 7.87 \pm 1.18 \mu\text{M}$  against A549, PC-3, MDAMB-231 and HepG2, respectively; % inhibition =  $0.33 \pm 0.04$  of VEGFR-2 at  $10 \mu\text{M}$

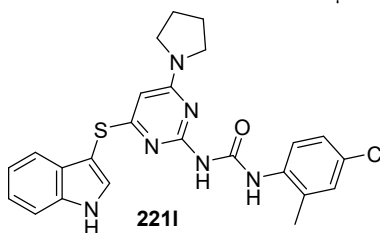

$IC_{50} = 8.93 \pm 1.21, 12.86 \pm 1.19, 9.44 \pm 1.14, 7.15 \pm 0.95 \mu\text{M}$  against A549, PC-3, MDAMB-231 and HepG2, respectively; % inhibition =  $0.43 \pm 0.05$  of VEGFR-2 at  $10 \mu\text{M}$

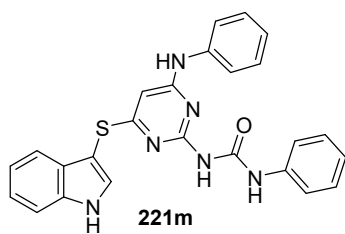

$IC_{50} = >50, 26.43 \pm 2.12, 35.92 \pm 1.43, 14.40 \pm 0.92 \mu\text{M}$  against A549, PC-3, MDAMB-231 and HepG2, respectively; % inhibition =  $2.74 \pm 0.23$  of VEGFR-2 at  $10 \mu\text{M}$

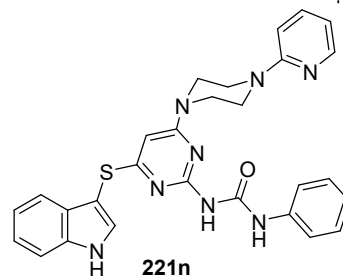

$IC_{50} = 30.25 \pm 4.25, 21.64 \pm 1.55, 19.51 \pm 1.38, 8.93 \pm 0.81 \mu\text{M}$  against A549, PC-3, MDAMB-231 and HepG2, respectively; % inhibition =  $1.71 \pm 0.21$  of VEGFR-2 at  $10 \mu\text{M}$

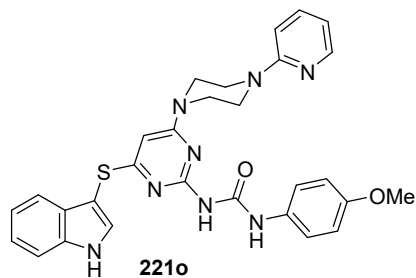

$IC_{50} = >50, 33.43 \pm 2.86, 28.42 \pm 2.01, 11.42 \pm 1.61 \mu\text{M}$  against A549, PC-3, MDAMB-231 and HepG2, respectively; % inhibition =  $4.15 \pm 0.34$  of VEGFR-2 at  $10 \mu\text{M}$

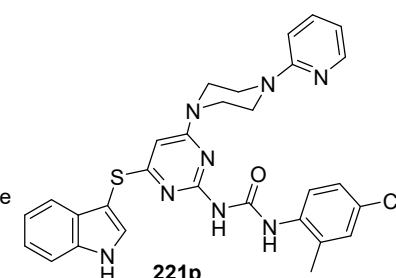

$IC_{50} = >50, 19.81 \pm 1.32, 34.70 \pm 2.31, 7.64 \pm 0.64 \mu\text{M}$  against A549, PC-3, MDAMB-231 and HepG2, respectively; % inhibition =  $0.92 \pm 0.11$  of VEGFR-2 at  $10 \mu\text{M}$

**Fig. S17 (continued).** Antiproliferation and inhibitory properties of VEGFR-2 for indole pyrimidine conjugates **221** and Sorafenib.

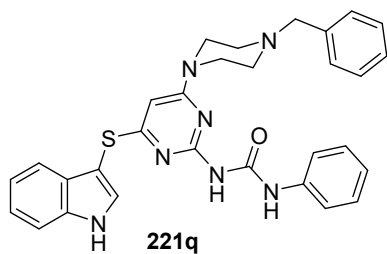

$IC_{50} = >50, 42.47 \pm 3.31, 10.22 \pm 0.82, 8.16 \pm 1.31 \mu\text{M}$   
 against A549, PC-3, MDAMB-231 and HepG2, respectively; % inhibition =  $0.67 \pm 0.08$  of VEGFR-2 at  $10 \mu\text{M}$

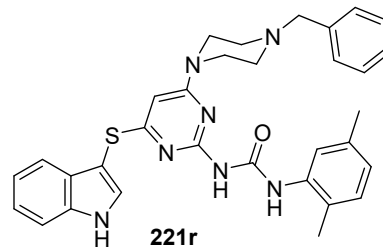

$IC_{50} = >50, 17.29 \pm 0.92, 18.96 \pm 1.43, 16.35 \pm 1.23 \mu\text{M}$   
 against A549, PC-3, MDAMB-231 and HepG2, respectively; % inhibition =  $2.14 \pm 0.21$  of VEGFR-2 at  $10 \mu\text{M}$

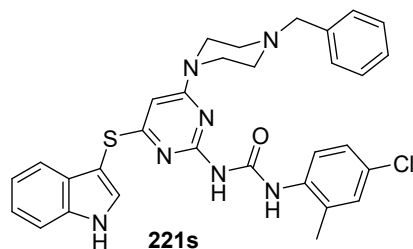

$IC_{50} = >50, 22.45 \pm 1.42, 22.13 \pm 1.52, 11.74 \pm 1.61 \mu\text{M}$   
 against A549, PC-3, MDAMB-231 and HepG2, respectively; % inhibition =  $4.86 \pm 0.27$  of VEGFR-2 at  $10 \mu\text{M}$

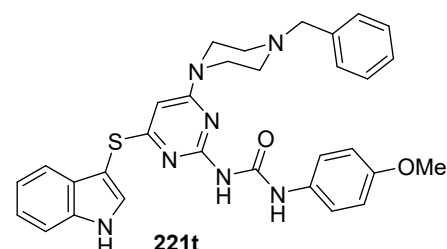

$IC_{50} = 42.31 \pm 3.16, 16.73 \pm 1.93, 8.92 \pm 0.61, 21.42 \pm 1.73 \mu\text{M}$   
 against A549, PC-3, MDAMB-231 and HepG2, respectively; % inhibition =  $0.84 \pm 0.13$  of VEGFR-2 at  $10 \mu\text{M}$

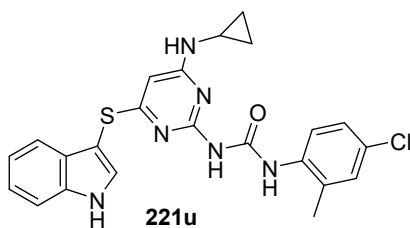

$IC_{50} = 31.49 \pm 2.11, 11.12 \pm 0.98, 14.61 \pm 1.24, 9.74 \pm 1.24 \mu\text{M}$   
 against A549, PC-3, MDAMB-231 and HepG2, respectively; % inhibition =  $0.44 \pm 0.07$  of VEGFR-2 at  $10 \mu\text{M}$

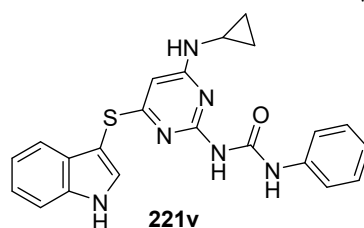

$IC_{50} = >50, 17.54 \pm 1.21, 7.86 \pm 1.11, 14.32 \pm 1.97 \mu\text{M}$   
 against A549, PC-3, MDAMB-231 and HepG2, respectively; % inhibition =  $5.22 \pm 0.42$  of VEGFR-2 at  $10 \mu\text{M}$

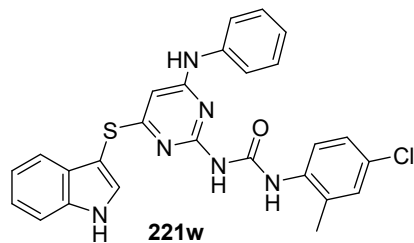

$IC_{50} = 23.45 \pm 3.17, 18.45 \pm 2.72, 13.42 \pm 0.93, 14.90 \pm 1.19 \mu\text{M}$   
 against A549, PC-3, MDAMB-231 and HepG2, respectively; % inhibition =  $1.33 \pm 0.18$  of VEGFR-2 at  $10 \mu\text{M}$

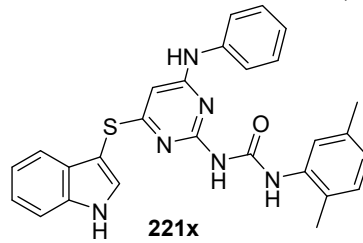

$IC_{50} = >50, 41.86 \pm 5.92, 17.10 \pm 1.45, 8.37 \pm 0.58 \mu\text{M}$   
 against A549, PC-3, MDAMB-231 and HepG2, respectively; % inhibition =  $2.82 \pm 0.31$  of VEGFR-2 at  $10 \mu\text{M}$

**Fig. S17 (continued).** Antiproliferation and inhibitory properties of VEGFR-2 for indole pyrimidine conjugates **221** and Sorafenib.

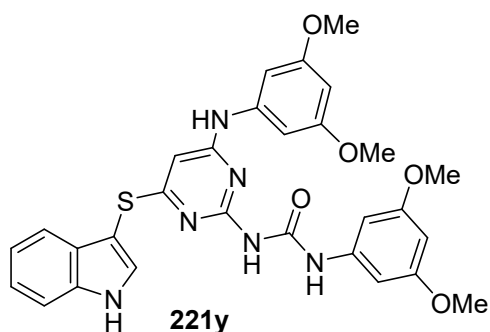

$IC_{50} = >50, 11.64 \pm 2.17,$   
 $>50, 24.82 \pm 3.11 \mu\text{M}$  against  
 A549, PC-3, MDAMB-231 and  
 HepG2, respectively; % inhibition  
 $= 3.51 \pm 0.34$  of VEGFR-2 at  $10 \mu\text{M}$

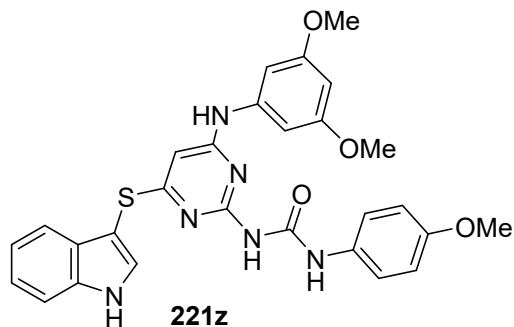

$IC_{50} = >50, 15.10 \pm 0.93,$   
 $9.46 \pm 1.21, 17.40 \pm 2.02 \mu\text{M}$   
 against A549, PC-3, MDAMB-231  
 and HepG2, respectively; % inhibition  
 $= 1.43 \pm 0.21$  of VEGFR-2 at  $10 \mu\text{M}$

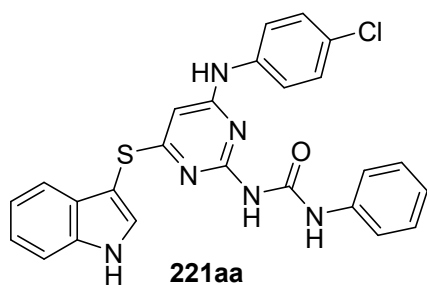

$IC_{50} = 48.43 \pm 6.91, 32.28 \pm 4.11,$   
 $10.26 \pm 1.46, 12.63 \pm 0.93 \mu\text{M}$   
 against A549, PC-3, MDAMB-231  
 and HepG2, respectively; % inhibition  
 $= 1.81 \pm 0.16$  of VEGFR-2 at  $10 \mu\text{M}$

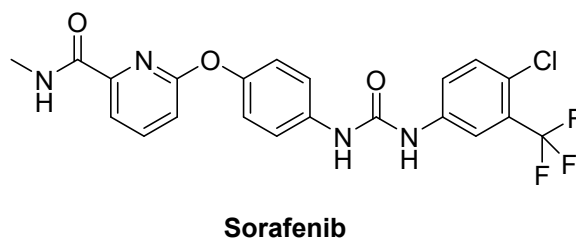

$IC_{50} = 7.43 \pm 0.81, 9.77 \pm 1.12,$   
 $11.84 \pm 1.25, 5.78 \pm 0.41 \mu\text{M}$   
 against A549, PC-3, MDAMB-231  
 and HepG2, respectively; % inhibition  
 $= 1.21 \pm 0.02$  of VEGFR-2 at  $10 \mu\text{M}$

**Fig. S17 (continued).** Antiproliferation and inhibitory properties of VEGFR-2 for indole pyrimidine conjugates **221** and Sorafenib.

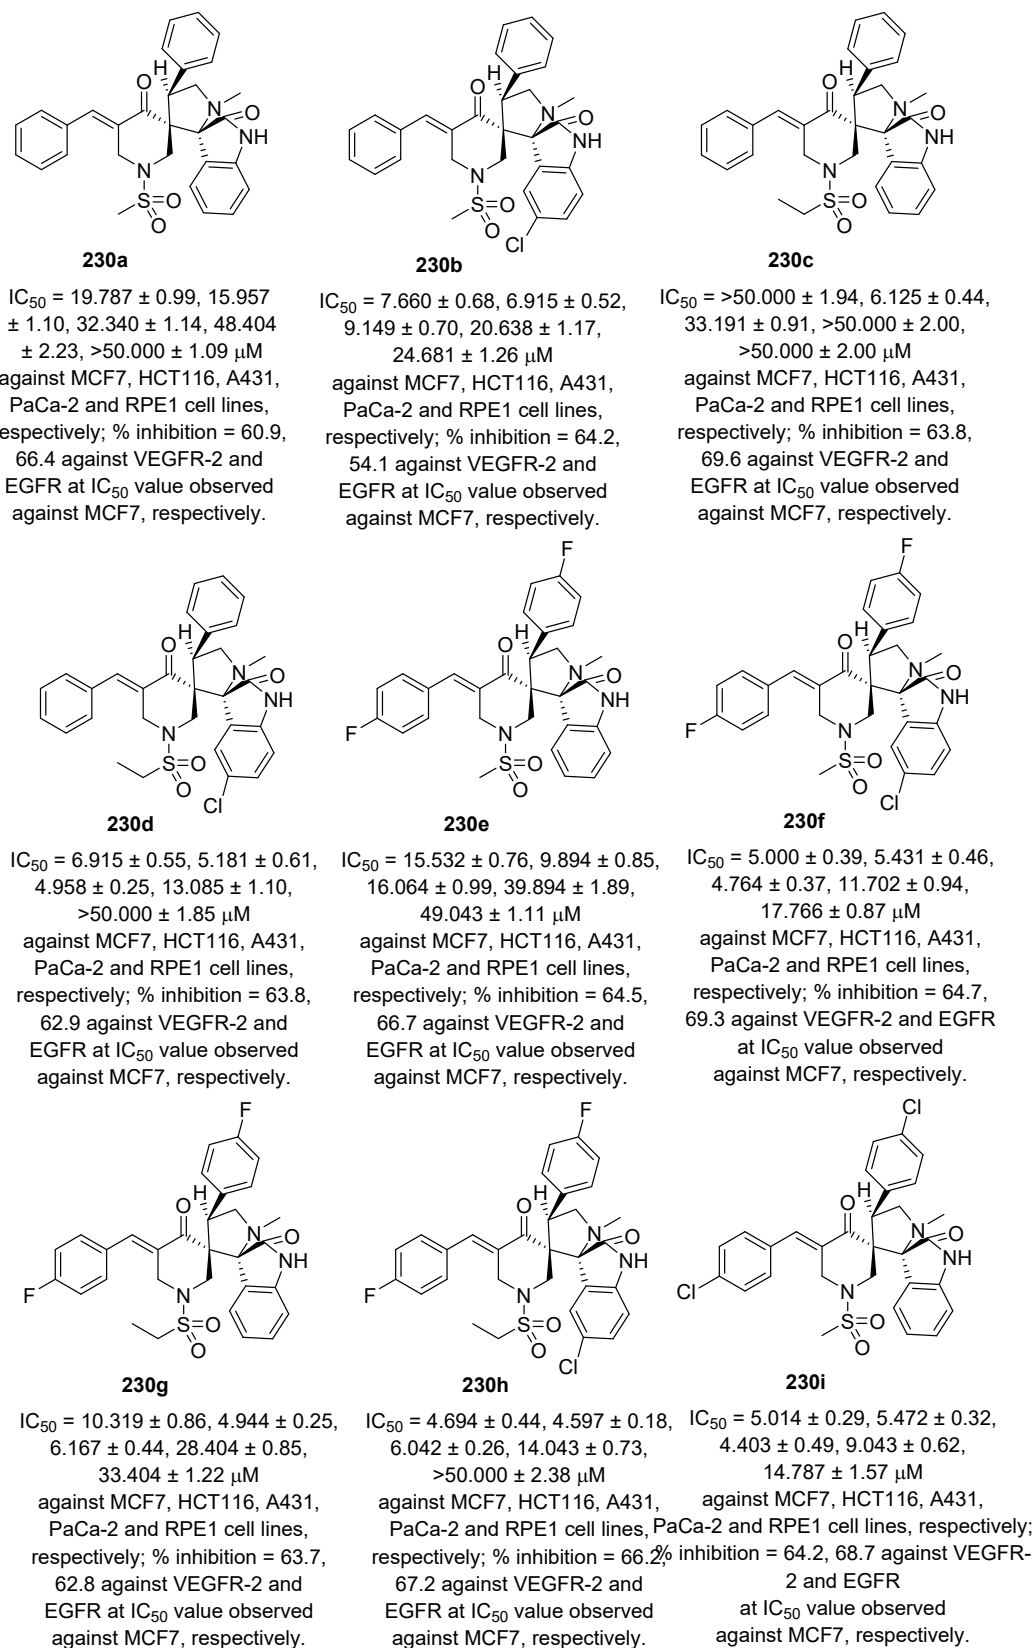

**Fig. S18.** Antiproliferation and enzymatic inhibitory (VEGFR-2 and EGFR) properties of spiroindoles **230** and reference standards (Sunitinib and 5-Fluorouracil).

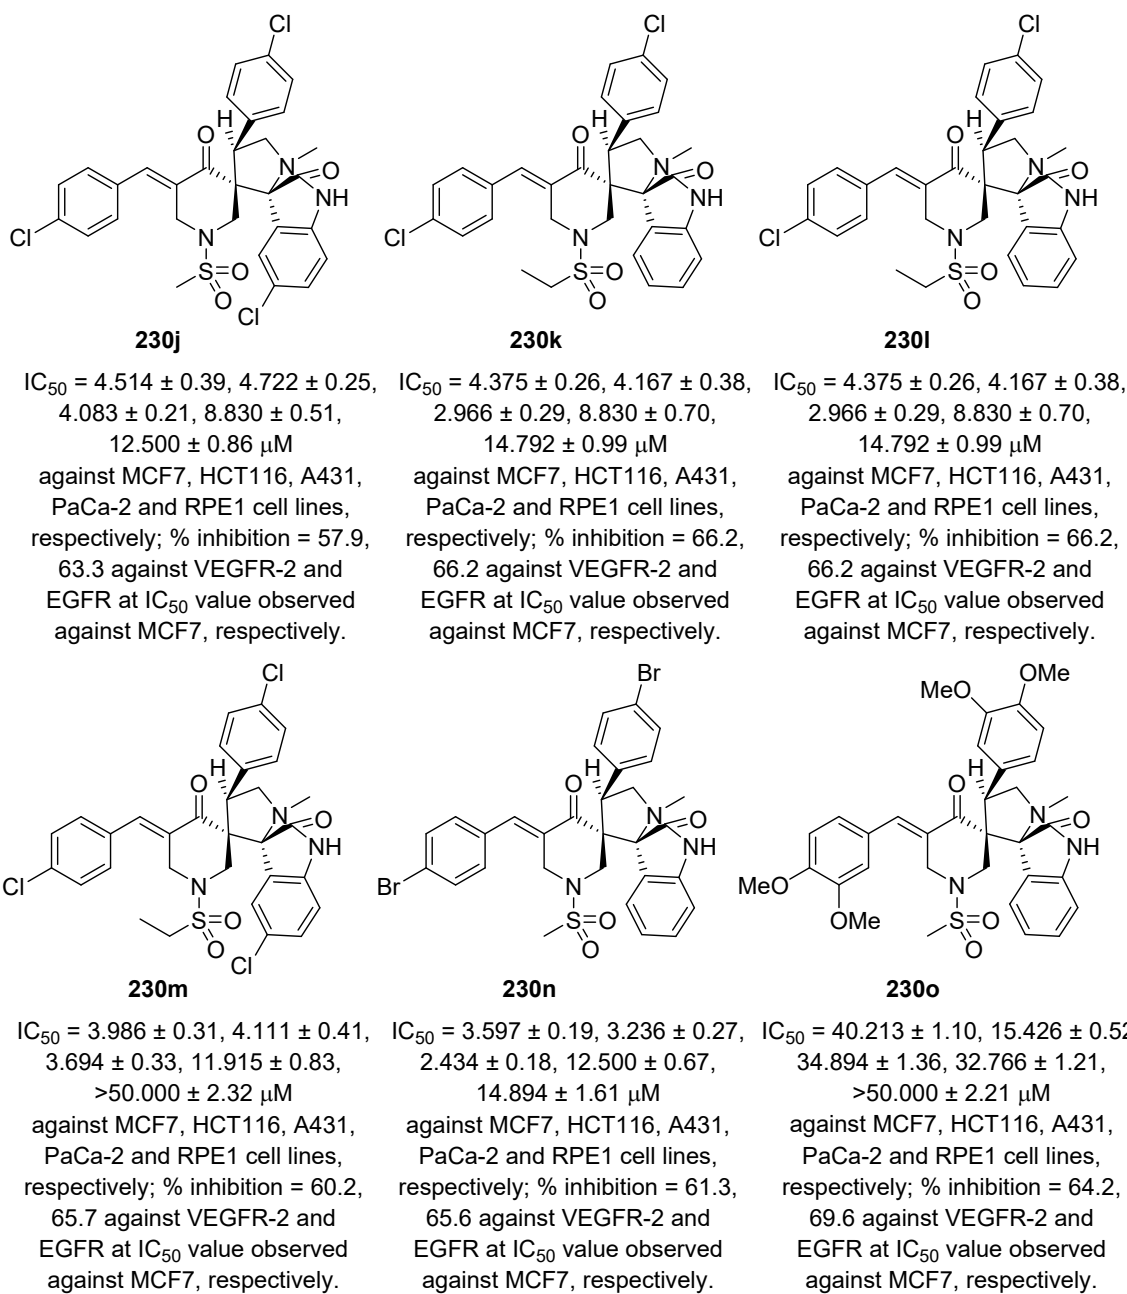

**Fig. S18 (continued).** Antiproliferation and enzymatic inhibitory (VEGFR-2 and EGFR) properties of spiroindoles **230** and reference standards (Sunitinib and 5-Fluorouracil).

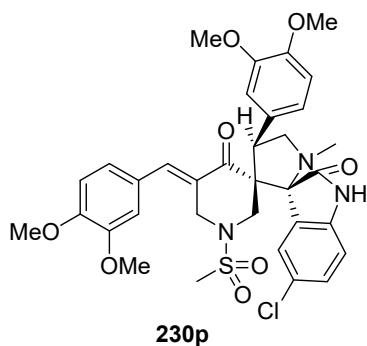

IC<sub>50</sub> = 48.936 ± 1.84, 28.511 ± 0.75, 45.417 ± 1.84, >50.000 ± 2.31, >50.000 ± 2.61 μM against MCF7, HCT116, A431, PaCa-2 and RPE1 cell lines, respectively; % inhibition = 61.8, 65.9 against VEGFR-2 and EGFR at IC<sub>50</sub> value observed against MCF7, respectively.

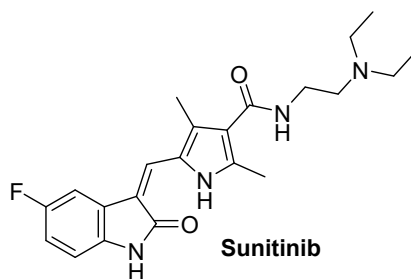

IC<sub>50</sub> = 3.97 ± 0.32, 9.67 ± 0.22, 16.91 ± 0.95 μM against MCF7, HCT116, and PaCa-2 cell lines, respectively; % inhibition = 74.7, 81.4 against VEGFR-2 and EGFR at IC<sub>50</sub> value observed against MCF7, respectively.

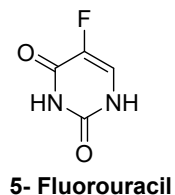

IC<sub>50</sub> = 3.15 ± 0.44, 20.43 ± 1.99, 23.44 ± 2.09 μM against MCF7, HCT116, and A431 cell lines, respectively.

**Fig. S18 (continued).** Antiproliferation and enzymatic inhibitory (VEGFR-2 and EGFR) properties of spiroindoles **230** and reference standards (Sunitinib and 5-Fluorouracil).
